# 1 Division of labor in metabolic regulation by transcription, translation, acetylation 2 and phosphorylation

3 Sriram Chandrasekaran<sup>1,2,\*</sup>

4 <sup>1</sup> - Department of Biomedical Engineering, <sup>2</sup> - Center for Computational Medicine and Bioinformatics, University  
5 of Michigan, Ann Arbor, MI, USA, 48109

6 \* - Correspondence: [csriram@umich.edu](mailto:csriram@umich.edu)

## 7 Abstract

8 The metabolism of most organisms is controlled by a diverse cast of regulatory processes, including  
9 transcriptional regulation and post-translational modifications (PTMs). Yet how metabolic control is  
10 distributed between these regulatory processes is unknown. Here we present *Comparative Analysis of*  
11 *Regulators of Metabolism* (CAROM), an approach that compares regulators based on network  
12 connectivity, flux, and essentiality of their reaction targets. Using CAROM, we analyze transcriptome,  
13 proteome, acetylome and phospho-proteome dynamics during transition to stationary phase in *E. coli*  
14 and *S. cerevisiae*. CAROM uncovered that the targets of each regulatory process shared unique  
15 metabolic properties: growth-limiting reactions were regulated by acetylation, while isozymes and futile-  
16 cycles were preferentially regulated by phosphorylation. Reversibility, essentiality, and molecular-  
17 weight further distinguished reactions controlled through diverse mechanisms. While every enzyme can  
18 be potentially regulated by multiple mechanisms, analysis of context-specific datasets reveals a  
19 conserved partitioning of metabolic regulation based on reaction attributes.

## 20 Author summary

21 There are several ways to regulate an enzyme's activity in a cell. Yet, the design principles that  
22 determine when an enzyme is regulated by transcription, translation or post-translational modifications  
23 are unknown. Each control mechanism, such as transcription, comprises several regulators that control  
24 a distinct set of targets. So far, it is unclear if similar partitioning of targets occurs at a higher level,  
25 between different control mechanisms. Here we systematically analyze patterns of metabolic regulation  
26 in model microbes. We find that five key parameters can distinguish the targets of each mechanism.  
27 These key parameters provide insights on specific roles played by each mechanism in determining  
28 overall metabolic activity. This approach may help define the basic regulatory architecture of metabolic  
29 networks.

## 30 Introduction

31 A myriad control mechanisms regulate microbial metabolic adaptation to new environments [1–8].  
32 Nevertheless, microbes deploy distinct regulatory mechanisms to regulate enzyme activity in response  
33 to specific environmental challenges. For example, *B. subtilis* cells primarily utilize transcriptional  
34 regulation when glucose is available, but post-transcriptionally regulate metabolic enzymes after malate  
35 addition [9]. In both *E. coli* and yeast, some pathways, such as glycolysis, are predominantly regulated  
36 by post-transcriptional regulation, while others, such as the TCA cycle, are regulated at the  
37 transcriptional level [1,3,10]. This suggest that apart from differences in response time, specific  
38 mechanisms are deployed for specialized regulatory tasks. Nevertheless, it is unclear why some  
39 enzymes are regulated using acetylation or via other PTMs such as phosphorylation [3,4].

40 Numerous advantages of regulation by PTMs have been proposed over the past five decades [11–13].  
41 These include low energy requirements, rapid response, and signal amplification. Yet these

42 characteristics are not unique to PTMs, and these features also do not differentiate between PTMs  
43 such as acetylation and phosphorylation. The staggering complexity of each regulatory process has  
44 limited the comparative analysis of metabolic regulation at a systems level [3]. Existing studies have  
45 focused on a small set of metabolic pathways or on a single regulatory process [4,10,14–20]. Such  
46 studies have revealed reaction reversibility and metabolic network structure to be predictive of  
47 regulation [8,16,21–24]. Yet these studies do not shed light on the differences between each regulatory  
48 process. In sum, although some general network principles of regulation are known, how it is  
49 partitioned among various regulatory mechanisms is unclear.

50 We hence developed a data-driven approach, called *Comparative Analysis of Regulators of Metabolism*  
51 (CAROM), to identify unique features of each regulatory process. CAROM achieves this by comparing  
52 various properties of metabolic enzymes, including essentiality, flux, molecular weight and topology. It  
53 identifies those properties that are highly enriched among targets of each process than expected out of  
54 random chance.

## 55 **Results and Discussion**

56 Here we focus on four well-studied control mechanisms with available omics datasets - transcription,  
57 post-transcription, phosphorylation and acetylation. We analyzed the dynamics of metabolic regulation  
58 during a well-characterized process in yeast, namely, transition to stationary phase. We obtained RNA  
59 sequencing, time-course proteomics, acetylomics, and phospho-proteomics data from the literature  
60 [25–27]. Targets for each process were determined based on differential levels between stationary and  
61 exponential phase (Methods). We assumed that PTMs and other regulatory sites that are dynamic and  
62 conditionally regulated are likely to be functional [28].

63 The targets of diverse regulatory mechanisms were used as input to CAROM. CAROM analyzes the  
64 properties of the targets in the context of a genome-scale metabolic network model of yeast [29]. We  
65 hypothesized that differences in target preferences between diverse regulators can be inferred from the  
66 network topology and fluxes. Protein and gene targets of each process were mapped to corresponding  
67 metabolic reactions in the model. There was significant overlap among reactions regulated through  
68 changes in both the transcriptome and proteome, and transcriptome and acetylome (hypergeometric p-  
69 value =  $5 \times 10^{-25}$  and  $1 \times 10^{-15}$  respectively; S. Table 1). In contrast, there was little overlap between  
70 targets of phosphorylation with other mechanisms (p-value > 0.1; S. Table 1). While prior studies found  
71 higher overlap between targets of PTMs [30,31], they used all possible sites that can be acetylated or  
72 phosphorylated. However, only a fraction of PTM sites are likely to be active and functional in a single  
73 condition. Overall, each regulatory mechanism had a distinct set of targets (Figure 1A).

74 What are the common features of enzymes that are regulated by each mechanism? To answer this, we  
75 used CAROM to compare the regulation of enzymes that are essential for growth in minimal media.  
76 Essential enzymes in the yeast metabolic model were determined using Flux Balance Analysis (FBA)  
77 [32]. Surprisingly, this set of enzymes was highly enriched among those regulated by acetylation but  
78 not by other processes (ANOVA p-value <  $10^{-16}$ ; Figure 1B; S. Table 2). Since regulation can be  
79 optimized for fitness across multiple conditions [33], we identified enzymes that impact growth in 87  
80 different nutrient conditions comprising various carbon and nitrogen sources using FBA. This set of  
81 essential enzymes was once again enriched for acetylation relative to other mechanisms (ANOVA p-  
82 value <  $10^{-16}$ ; S. Figure 1). This trend was observed using experimentally derived list of essential genes  
83 as well (hypergeometric p-value =  $2 \times 10^{-7}$  for acetylation). Interestingly, in contrast to acetylation,  
84 genes regulated at the proteomic level were significantly under-represented among the essential genes  
85 (hypergeometric p-value of depletion =  $8 \times 10^{-11}$ ). Thus, essential enzymes are likely to be constitutively

86 expressed and their activity modulated through acetylation. This may explain why transcriptional  
87 regulation has minimal impact on fluxes in central metabolism, which contain several growth-limiting  
88 enzymes [3,10].

89 We next used CAROM to determine the impact of reaction position in the network on its regulation. We  
90 counted the number of pathways each reaction is involved in, along with other topological metrics, such  
91 as the closeness, degree and page rank. We found that the regulation of enzymes differed significantly  
92 based on network topology (Figure 1C). First, reactions with low connectivity, measured through any of  
93 the topological metrics, were highly likely to be unregulated. In contrast, highly connected enzymes  
94 linking multiple pathways were more likely to be regulated by PTMs. Interestingly, reactions regulated  
95 by both the PTMs had the highest connectivity (S. Figures 2, 3). Several key hubs, such as acetyl-CoA  
96 acetyltransferase, hexokinase and phosphofructokinase are regulated by at least 2 different  
97 mechanisms (S. Table 3).

98 We next assessed how regulation differs based on the magnitude and direction of flux through the  
99 network. We inferred the full range of fluxes possible through each reaction using flux variability  
100 analysis (FVA) [34]. Since yeast cells may not optimize their metabolism for biomass synthesis during  
101 transition to stationary phase, we also performed FVA without assuming biomass maximization. We  
102 found that irreversible reactions were highly likely to be regulated (S. Figure 4). A recent study found  
103 the same trend for allosteric regulation as well [21]. However, reversibility alone did not differentiate  
104 between regulatory mechanisms.

105 Interestingly, reactions that have the potential to carry high fluxes were predominantly regulated by  
106 phosphorylation (Figure 1D; ANOVA p-value <  $10^{-16}$ ). This set of phosphorylated reactions comprise  
107 several kinase-phosphatase pairs, enzymes that are part of loops that consume energy (“futile cycles”),  
108 or reactions that have isozymes in compartments such as vacuoles or nucleus (S. Table 4). Thus,  
109 phosphorylation in this condition selectively regulates reactions to avoid futile cycling between  
110 antagonizing reactions or those operating in different compartments. Using data from experimentally  
111 constrained fluxes from Hackett *et al* study [21] revealed similar patterns of regulation (S. Figure 5).  
112 Reactions with the highest flux, such as ATP synthase, phosphofructokinase, and nucleotide kinase,  
113 were also regulated by multiple mechanisms.

114 Finally, we compared regulation based on fundamental enzyme properties: catalytic activity and  
115 molecular weight. While catalytic activity was similar across the targets of all mechanisms, targets of  
116 phosphorylation had the highest molecular weight (p-value <  $10^{-16}$ ) (S. Figures 6,7). There is a weak  
117 correlation between molecular weight and maximum flux (Pearson’s correlation  $R = 0.02$ ), suggesting  
118 that both maximum flux and molecular weight are likely to be independent predictors of regulation by  
119 phosphorylation.

120 To check if this pattern of regulation is observed in other conditions, using CAROM, we analyzed data  
121 from nitrogen starvation response and the cell cycle in yeast, where both phospho-proteomics and  
122 transcriptomics data are available [35–38]. A similar trend of regulation was observed in these  
123 conditions with phosphorylation regulating isozymes and enzymes that can carry high fluxes (futile  
124 cycles) (Figure 2). Since isozymes arise frequently from gene duplication, our results may explain the  
125 observation that duplicated genes are more likely to be regulated by phosphorylation [39].

126 Since many mechanisms of metabolic regulation are evolutionarily conserved, we next analyzed data  
127 from *E. coli* cells during stationary phase [40–42]. By analyzing transcriptomics, proteomics,  
128 acetylomics and phosphoproteomics data using the *E. coli* metabolic network model, CAROM  
129 uncovered that the pattern of regulation observed in yeast was also observed in *E. coli* (Figure 3).

130 Reactions that were regulated in *E. coli* had higher topological connectivity compared to those that  
131 were unregulated. Further, essential reactions were enriched for regulation by acetylation, and  
132 reactions with high maximum flux or large enzyme molecular weight were enriched for regulation by  
133 phosphorylation. However, in contrast to yeast, phosphorylation impacted very few metabolic genes in  
134 *E. coli*, and may play a relatively minor role in this specific context. Phosphorylation had 20-fold fewer  
135 targets compared to other mechanisms, and its targets overlapped significantly with other processes  
136 (S. Tables 5-6).

137 In sum, our analysis reveals a unique distribution of regulation within the metabolic network (Figure 4).  
138 Within each process, it is well known that individual regulators such as transcription factors or kinases  
139 have their own unique set of targets. Here we find that similar specialization occurs at a higher scale,  
140 involving diverse processes. Reaction properties identified by CAROM to be associated with distinct  
141 regulatory mechanisms may be related to specific functions performed by each regulator. For example,  
142 phosphorylation may represent a mechanism of feedback regulation to control futile cycles and high  
143 flux reactions that consume ATP [6,43]. Finally, this pattern of regulation is context specific – predictive  
144 features such as reaction flux or essentiality can change between conditions and influence regulation.  
145 Further, while most essential reactions were regulated, a small subset (14%) were not found to be  
146 regulated by any mechanism. These enzymes could be sites of allosteric regulation or other regulatory  
147 mechanisms not covered here due to the lack of context specific datasets (S. Table 7). Overall, these  
148 results are robust to the thresholds used for finding differentially regulated sites, using data from  
149 different sources, and other modeling parameters (S. Tables 8-12).

150 Since microbes exhibit a wide range of metabolic behaviors, it is not possible to uncover regulation in  
151 each condition through experiments. We need tools like CAROM to identify factors that determine the  
152 deployment of regulatory mechanisms in a metabolic context. Although flux balance analysis of  
153 metabolic models can accurately forecast optimal flux distribution, it does not provide insights on how  
154 the flux rewiring is achieved. Our analysis predicts regulatory mechanisms that will likely orchestrate  
155 flux adjustments based on reaction attributes. This can guide drug discovery and metabolic engineering  
156 efforts by identifying regulators that are dominant in different parts of the network [44]. CAROM can be  
157 applied to uncover target specificities of other regulators such as non-coding RNAs and PTMs, and  
158 help understand the architecture of metabolic regulation in a wide range of organisms.

159

160

161

162

163

164

165

166

167

## 168 **Methods**

### 169 **CAROM**

170 The CAROM approach takes as input a list of genes that are the targets of one or more regulatory  
171 processes. It compares the properties of the targets and identifies significant differences in target  
172 properties between mechanisms using ANOVA. Overall, CAROM compares the following 13 properties:

- 173 • Impact of gene knockout on biomass production, ATP synthesis, and viability across 87 different  
174 conditions
- 175 • Flux through the network measured through Flux Variability analysis and PFBA, reaction  
176 reversibility
- 177 • Enzyme molecular weight and catalytic activity
- 178 • The total pathways each reaction is involved in, its Degree, Closeness and PageRank

179

180 The CAROM source-code is available from the Synapse bioinformatics repository

181 <https://www.synapse.org/CAROM>

182

### 183 **Processing omics data**

184 We used RNA-sequencing data from Treu *et al* 2014 that compared the expression profile of *S.*  
185 *cerevisiae* between mid-exponential growth phase with early stationary phase [27]. A 2-fold change  
186 threshold was used to identify differentially expressed genes. Lysine acetylation and protein  
187 phosphorylation data were obtained from the Weinert *et al* 2014 study that compared PTM levels  
188 between exponentially growing and stationary phase cells using *stable isotope labeling with amino*  
189 *acids in cell culture* (SILAC) [26]. A 2-fold change threshold of the protein-normalized PTM data was  
190 used to identify differentially expressed PTMs. Proteomics data was taken from Murphy *et al* time-  
191 course proteomics study [25]. The hoteling T2 statistic defined by the authors was used to identify  
192 proteins differentially expressed during diauxic shift; the top 25% of the differentially expressed proteins  
193 were assumed to be regulated. Proteomics data from Weinert *et al* was also used as an additional  
194 control and we observed the same trends using this data as well (S. Table 10). Further, we repeated  
195 the analysis after removing genes that were not expressed during transition to stationary phase; the  
196 transcripts for a total of 12 genes out of the 910 in the model were not detected by RNA-sequencing in  
197 the Treu *et al* study [27]. Removing the 12 genes did not impact any of the results (S. Table 9).

198 As additional validation, we used periodic data from the yeast cell cycle. Time-course SILAC phospho-  
199 proteomics data was obtained from Touati *et al* [37]. Phospho-sites whose abundance declined to less  
200 than 50% or increased by more than 50% at least two consecutive timepoints were considered  
201 dephosphorylated or phosphorylated respectively as defined by the authors. Transcriptomics data was  
202 taken from Kelliher *et al* study that identified 1246 periodic transcripts using periodicity-ranking  
203 algorithms [38].

204 The phospho-proteomics and transcriptome data during nitrogen shift was obtained from Oliveira *et al*  
205 [35,36]. The nitrogen shift studies compared the impact of adding glutamine to yeast cells growing on a  
206 poor nitrogen source (proline alone or glutamine depletion) with cells growing on a rich nitrogen source  
207 (glutamine plus proline). A 2-fold change threshold was used to identify differentially expressed  
208 transcripts and phospho-sites.



209 *E. coli* acetylation data was taken from the Weinert *et al* study comparing actively growing exponential  
210 phase cells to stationary phase cells [42]. Proteomics and transcriptomics were from Houser *et al* study  
211 of *E. coli* cells in early exponential phase and stationary phase [41]. Phospho-proteomics data for  
212 exponential and early stationary phase *E. coli* cells was taken from Soares *et al* [40]. We used a 2-fold  
213 change ( $p < 0.05$ ) threshold for all studies.

214 The results are robust to the thresholds used for identifying differentially expressed genes or proteins  
215 (S. Table 11). In all studies, genes and proteins that are either up or down regulated were considered to  
216 be regulated. The final data set table used for all comparative analyses is provided as a supplementary  
217 material (S. Table 13).

218

## 219 **Genome scale metabolic modeling**

220 We used the yeast metabolic network reconstruction (Yeast 7) by Aung *et al*, which contains 3,498  
221 reactions, 910 genes and 2,220 metabolites [29]. The analysis of *E. coli* data was done using the  
222 IJO1366 metabolic model [45]. All analyses were performed using COBRA toolbox for MATLAB [46].

223 The impact of gene knockouts on growth was determined using flux balance analysis (FBA). FBA  
224 identifies an optimal flux through the metabolic network that maximizes an objective, usually the  
225 production of biomass. A minimal glucose media (default condition) was used to determine the impact  
226 of gene knockouts. Further, gene knockout analysis was repeated in a set of 87 different minimal  
227 nutrient conditions to identify genes that impact growth across diverse conditions; these conditions  
228 span all carbon and nitrogen sources that can support growth in the Yeast 7 model. The number of  
229 times each gene was found to be lethal (growth  $< 0.01$  units) across all conditions was used as a metric  
230 of essentiality.

231 To infer topological properties, a reaction adjacency matrix was created by connecting reactions that  
232 share metabolites. We used the Centrality toolbox function in MATLAB to infer all network topological  
233 attributes including centrality, degree and PageRank.

234 Flux Variability Analysis (FVA) was used to infer the range of fluxes possible through every reaction in  
235 the network. Two sets of flux ranges were obtained with FVA – the first with optimal biomass and the  
236 latter without assuming optimality. In the second case, the fluxes are limited by the availability of  
237 nutrients and energetics alone, thus it reflects the full range of metabolic activity possible in a cell.  
238 Reactions with maximal flux above 900 units were assumed to be unconstrained and were excluded  
239 from the analysis, as they are likely due to thermodynamically infeasible internal cycles [47]; the choice  
240 of this threshold for flagging unconstrained reactions did not impact the distribution between regulators  
241 over a wide range of values (S. Table 12).

242 For fitting experimentally derived flux data from Hackett *et al* [21], reactions were fit to the fluxes using  
243 linear optimization and the flux through remaining reactions that do not have experimentally derived flux  
244 data were inferred using FVA. Analysis using a related approach for inferring fluxes – PFBA, did not  
245 reveal any significant difference as PFBA eliminates futile cycles and redundancy by minimizing total  
246 flux through the network while maximizing for biomass [48] (S. Figure 5).

247 Reaction reversibility was determined directly from the model annotations. We also used additional  
248 reversibility annotation from Martinez *et al* based on thermodynamics analysis of the Yeast metabolic  
249 model [49]. Pathway annotations, enzyme molecular weight and catalytic activity values were obtained

250 from Sanchez *et al* [50]. The comparative analysis of regulatory mechanisms was also repeated using  
251 the updated Yeast 7.6 model and yielded similar results (S. Table 8) [50].

252 The comparative analysis of target properties was done using gene-reaction pairs rather than genes or  
253 reactions alone; the gene-reaction pairs accounts for regulation involving all possible combinations of  
254 genes and associated reaction, including isozymes that may involve different genes but the same  
255 reaction or multi-functional enzymes involving same the gene associated with different reactions. The  
256 910 genes and 2310 gene-associated reactions resulted in 3375 unique gene-reaction pairs in yeast.

257 All statistical tests were performed using MATLAB. Significance of overlap between lists was estimated  
258 using the hypergeometric test. Significance of the differences in distribution of target properties  
259 between mechanisms were determined using ANOVA, the non-parametric Kruskal-Wallis test, and after  
260 multiple hypothesis correction (S. Table 8).

## Figures

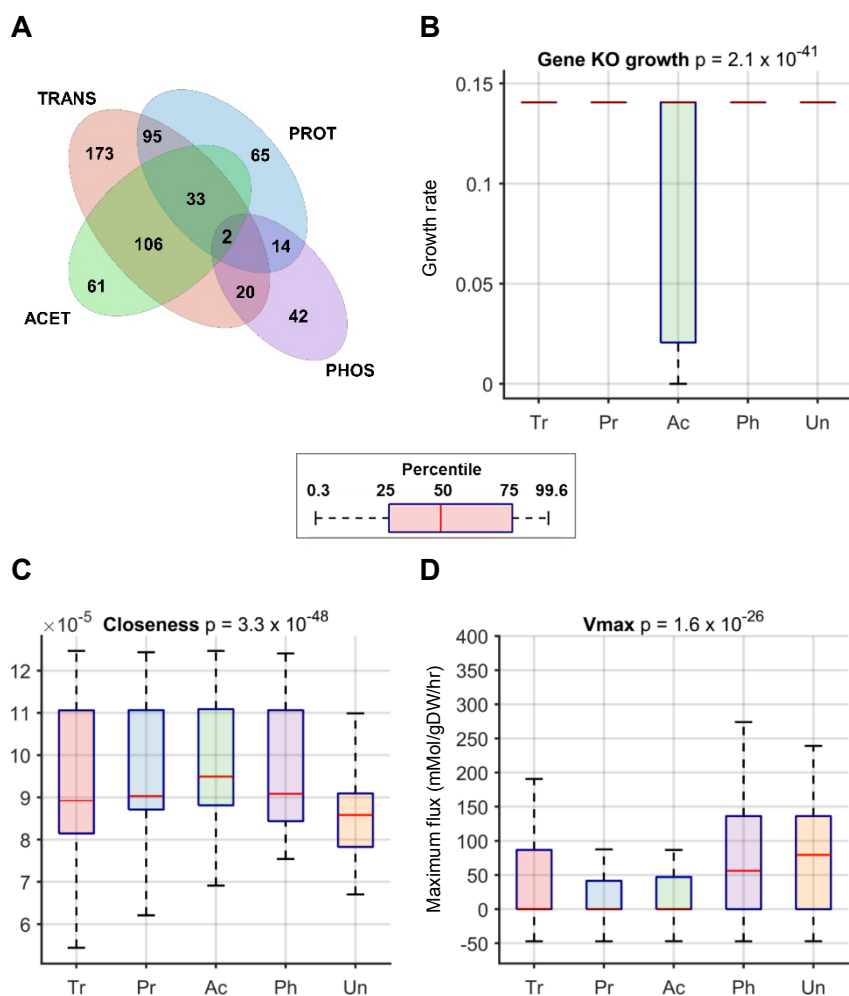

**Figure 1. Comparison of the properties of the targets of regulation in yeast during transition to stationary phase.** **A.** The Venn diagram shows the extent of overlap between targets of each process. Only 2 genes were found to be regulated by all four mechanisms. Targets of phosphorylation did not show any significant overlap with other mechanisms, while transcriptome and proteome showed the highest overlap (S. Table 1). **B.** Enzymes that impact growth when knocked out are highly likely to be acetylated. **C.** Enzymes with poor connectivity, as measured through the network connectivity metric - closeness, are more likely to be Unregulated. **D.** Enzymes catalyzing reactions with high maximum flux are likely to be either regulated through phosphorylation or to be unregulated. The Anova p-value comparing the differences in means is shown in the title. (Abbreviation: transcription (Tr), post-transcription (Pr), acetylation (Ac), phosphorylation (Ph) or Unregulated (Un)).



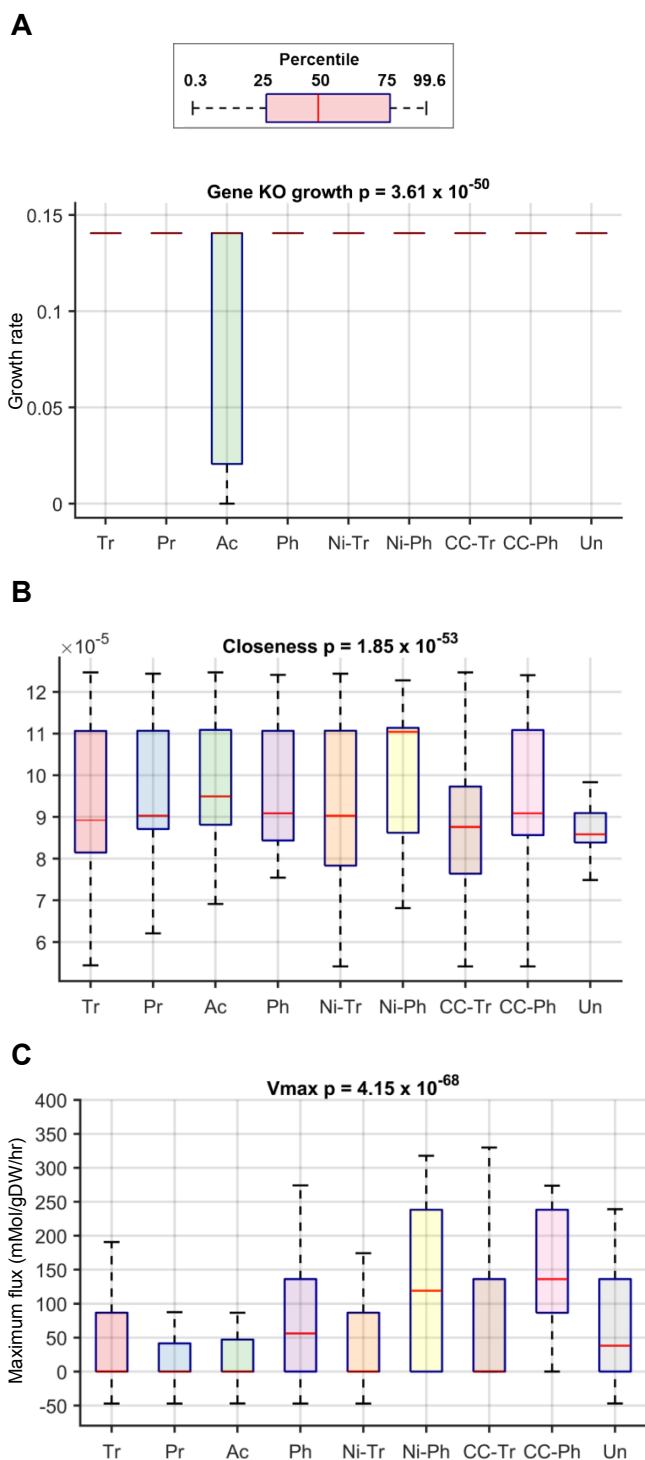

**Figure 2. Comparison of the properties of enzymes in yeast regulated by each mechanism during the cell cycle (CC-Tr, CC-Ph) and nitrogen starvation (Ni-Tr, Ni-Ph).** Data from stationary phase conditions (transcription (Tr), post-transcription (Pr), acetylation (Ac), phosphorylation (Ph) or Unregulated (Un)) are shown for comparison. Similar to stationary phase, enzymes that impact growth when knocked out are likely to be acetylated (**A**), enzymes that are highly connected are likely to be regulated by one of the four mechanisms (**B**) and those that catalyze reactions with high flux are likely to be regulated through phosphorylation in all three conditions (**C**). The Anova p-value comparing the differences in means is shown in the title.

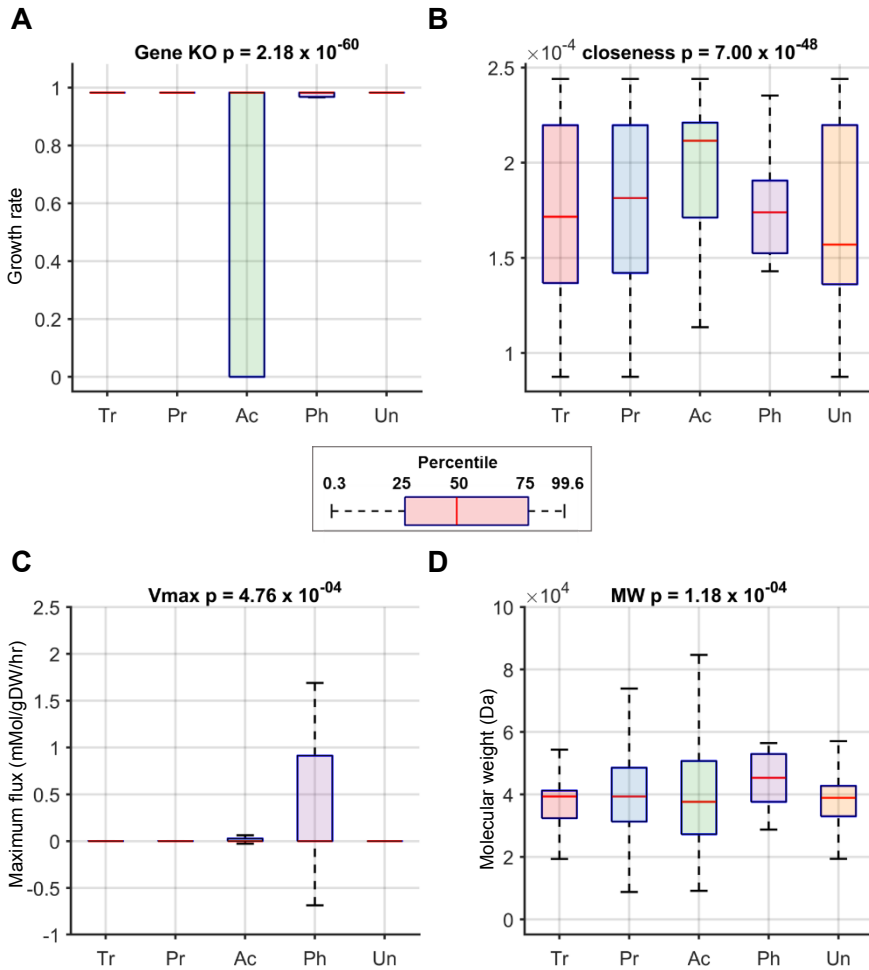

**Figure 3. Comparison of the properties of enzymes in *E. coli* regulated by transcription (Tr), post-transcription (Pr), acetylation (Ac), phosphorylation (Ph) or Unregulated (Un) during transition to stationary phase. Similar to yeast, reaction essentiality (A), connectivity (B), maximum flux (C) and molecular weight (D) are predictive of regulation by acetylation, all four mechanisms, and phosphorylation ( $V_{max}$ , MW) respectively.**

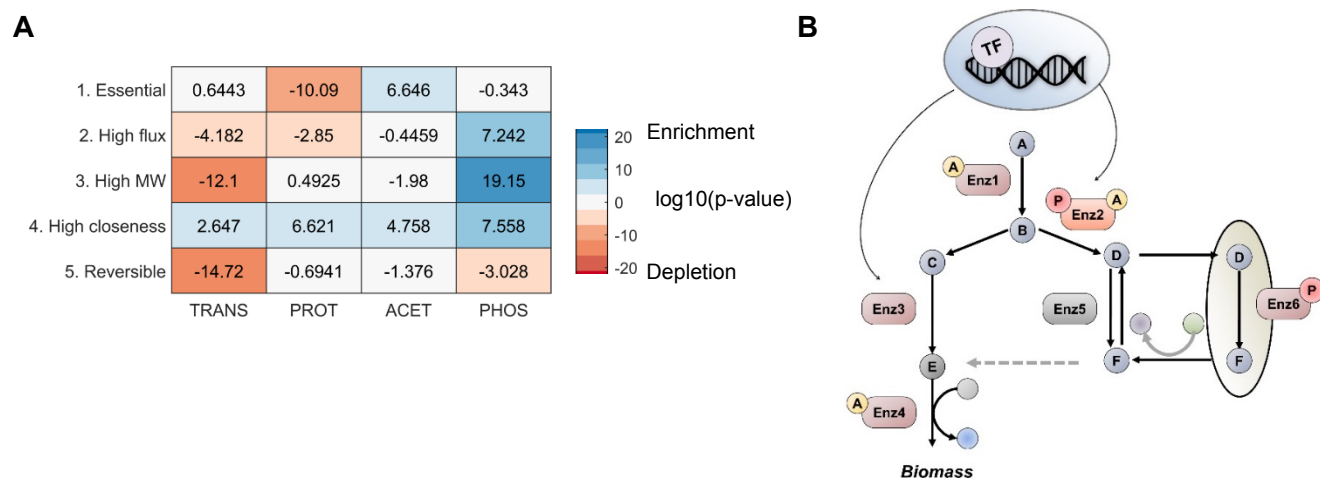

**Figure 4. Reaction attributes predictive of regulation by each process in yeast.** **A.** The heatmap shows the statistical enrichment and depletion of the targets of each process among reactions that are - (1) essential, (2) have high maximum flux ( $V_{max} > 75^{\text{th}}$  percentile), (3) catalyzed by enzymes with high molecular weight ( $MW > 75^{\text{th}}$  percentile), (4) highly connected (Closeness  $> 75^{\text{th}}$  percentile), and (5) reversible. The log-transformed p-values from hypergeometric test are shown with a positive sign for enrichment and negative sign for depletion. **B.** A schematic pathway summarizing the division of labor in metabolic regulation. Essential reactions (Enz1 and Enz4) are preferentially acetylated; reactions in futile cycles and in different compartments (Enz6) are phosphorylated; non-essential enzymes with low connectivity are regulated through transcriptional regulation (Enz3), and reactions with high connectivity are regulated through multiple mechanisms (Enz2). Reversible reactions are predominantly unregulated (Enz5).

261

262 **Acknowledgments: Funding:** This work was supported by faculty start-up funds from the University of  
263 Michigan to SC. **Author contributions:** SC conceived the study, designed and performed research,  
264 and wrote the manuscript. **Competing interests:** Authors declare no competing interests. **Data and**  
265 **materials availability:** All datasets are available in the supplementary materials

266

267

## References

- 268 1. Nielsen J. Systems Biology of Metabolism. *Annu Rev Biochem.* 2017; doi:10.1146/annurev-  
269 biochem-061516-044757
- 270 2. Cho BK, Zengler K, Qiu Y, Park YS, Knight EM, Barrett CL, et al. The transcription unit  
271 architecture of the *Escherichia coli* genome. *Nat Biotechnol.* 2009; doi:10.1038/nbt.1582
- 272 3. Chubukov V, Gerosa L, Kochanowski K, Sauer U. Coordination of microbial metabolism. *Nature*  
273 *Reviews Microbiology.* 2014. doi:10.1038/nrmicro3238
- 274 4. Heinemann M, Sauer U. Systems biology of microbial metabolism. *Curr Opin Microbiol.*  
275 2010/03/12. 2010;13: 337–343. doi:10.1016/j.mib.2010.02.005
- 276 5. Aebersold R, Agar JN, Amster IJ, Baker MS, Bertozzi CR, Boja ES, et al. How many human  
277 proteoforms are there? *Nature Chemical Biology.* 2018. doi:10.1038/nchembio.2576
- 278 6. Kochanowski K, Sauer U, Noor E. Posttranslational regulation of microbial metabolism. *Curr*  
279 *Opin Microbiol.* 2015;27: 10–17.
- 280 7. Ihmels J, Levy R, Barkai N. Principles of transcriptional control in the metabolic network of  
281 *Saccharomyces cerevisiae*. *Nat Biotechnol.* 2004; doi:10.1038/nbt918
- 282 8. Stadtman ER. Mechanisms of Enzyme Regulation in Metabolism. *Enzymes.* 1970;  
283 doi:10.1016/S1874-6047(08)60171-7
- 284 9. Buescher JM, Liebermeister W, Jules M, Uhr M, Muntel J, Botella E, et al. Global network  
285 reorganization during dynamic adaptations of *Bacillus subtilis* metabolism. *Science (80- )*. 2012;  
286 doi:10.1126/science.1206871
- 287 10. Daran-Lapujade P, Rossell S, van Gulik WM, Luttik MAH, de Groot MJL, Slijper M, et al. The  
288 fluxes through glycolytic enzymes in *Saccharomyces cerevisiae* are predominantly regulated at  
289 posttranscriptional levels. *Proc Natl Acad Sci.* 2007; doi:10.1073/pnas.0707476104
- 290 11. Holzer H, Duntze W. Metabolic Regulation by Chemical Modification of Enzymes. *Annu Rev*  
291 *Biochem.* 1971; doi:10.1146/annurev.bi.40.070171.002021
- 292 12. Fell D, Cornish-Bowden A. Understanding the control of metabolism. Portland press London;  
293 1997.
- 294 13. Stadtman ER, Chock PB. Interconvertible Enzyme Cascades in Metabolic Regulation. *Current*  
295 *Topics in Cellular Regulation.* 1978. doi:10.1016/B978-0-12-152813-3.50007-0
- 296 14. Zhao S, Xu W, Jiang W, Yu W, Lin Y, Zhang T, et al. Regulation of cellular metabolism by protein  
297 lysine acetylation. *Science (80- )*. 2010;327: 1000–1004.

- 298 15. Oliveira AP, Ludwig C, Picotti P, Kogadeeva M, Aebersold R, Sauer U. Regulation of yeast  
299 central metabolism by enzyme phosphorylation. *Mol Syst Biol.* 2012; doi:10.1038/msb.2012.55
- 300 16. Zaslaver A, Mayo AE, Rosenberg R, Bashkin P, Sberro H, Tsalyuk M, et al. Just-in-time  
301 transcription program in metabolic pathways. *Nat Genet.* 2004; doi:10.1038/ng1348
- 302 17. Lee JM, Gianchandani EP, Eddy JA, Papin JA. Dynamic analysis of integrated signaling,  
303 metabolic, and regulatory networks. *PLoS Comput Biol.* 2008/05/17. 2008;4: e1000086.  
304 doi:10.1371/journal.pcbi.1000086
- 305 18. Covert MW, Knight EM, Reed JL, Herrgard MJ, Palsson BO. Integrating high-throughput and  
306 computational data elucidates bacterial networks. *Nature.* 2004/05/07. 2004;429: 92–96.  
307 doi:10.1038/nature02456nature02456 [pii]
- 308 19. Shen F, Boccuto L, Pauly R, Srikanth S, Chandrasekaran S. Genome-scale network model of  
309 metabolism and histone acetylation reveals metabolic dependencies of histone deacetylase  
310 inhibitors. *Genome Biol.* 2019;20: 49. doi:10.1186/s13059-019-1661-z
- 311 20. Chandrasekaran S, Price ND. Probabilistic integrative modeling of genome-scale metabolic and  
312 regulatory networks in *Escherichia coli* and *Mycobacterium tuberculosis*. *Proc Natl Acad Sci.*  
313 *National Acad Sciences;* 2010;107: 17845–17850.
- 314 21. Hackett SR, Zanotelli VRT, Xu W, Goya J, Park JO, Perlman DH, et al. Systems-level analysis of  
315 mechanisms regulating yeast metabolic flux. *Science (80- ).* 2016; doi:10.1126/science.aaf2786
- 316 22. Almaas E, Kovács B, Vicsek T, Oltvai ZN, Barabási AL. Global organization of metabolic fluxes  
317 in the bacterium *Escherichia coli*. *Nature.* 2004; doi:10.1038/nature02289
- 318 23. Stelling J, Klamt S, Bettenbrock K, Schuster S, Gilles ED. Metabolic network structure  
319 determines key aspects of functionality and regulation. *Nature.* 2002; doi:10.1038/nature01166
- 320 24. Stelling J, Sauer U, Szallasi Z, Doyle FJ, Doyle J. Robustness of cellular functions. *Cell.* 2004.  
321 doi:10.1016/j.cell.2004.09.008
- 322 25. Murphy JP, Stepanova E, Everley RA, Paulo JA, Gygi SP. Comprehensive Temporal Protein  
323 Dynamics during the Diauxic Shift in *Saccharomyces cerevisiae* . *Mol Cell Proteomics.* 2015;  
324 doi:10.1074/mcp.m114.045849
- 325 26. Weinert BT, Iesmantavicius V, Moustafa T, Schölz C, Wagner SA, Magnes C, et al. Acetylation  
326 dynamics and stoichiometry in *Saccharomyces cerevisiae*. *Mol Syst Biol.* 2014;10: 716.
- 327 27. Treu L, Campanaro S, Nadai C, Toniolo C, Nardi T, Giacomini A, et al. Oxidative stress response  
328 and nitrogen utilization are strongly variable in *Saccharomyces cerevisiae* wine strains with  
329 different fermentation performances. *Appl Microbiol Biotechnol.* 2014; doi:10.1007/s00253-014-  
330 5679-6
- 331 28. Beltrao P, Bork P, Krogan NJ, Van Noort V. Evolution and functional cross-talk of protein post-  
332 translational modifications. *Molecular Systems Biology.* 2013. doi:10.1002/msb.201304521
- 333 29. Aung HW, Henry SA, Walker LP. Revising the representation of fatty acid, glycerolipid, and  
334 glycerophospholipid metabolism in the consensus model of yeast metabolism. *Ind Biotechnol.*  
335 2013;9: 215–228. doi:10.1089/ind.2013.0013
- 336 30. Oliveira AP, Sauer U. The importance of post-translational modifications in regulating  
337 *Saccharomyces cerevisiae* metabolism. *FEMS Yeast Research.* 2012. doi:10.1111/j.1567-  
338 1364.2011.00765.x

- 339 31. Beltrao P, Albanèse V, Kenner LR, Swaney DL, Burlingame A, Villén J, et al. Systematic  
340 functional prioritization of protein posttranslational modifications. *Cell*. 2012;  
341 doi:10.1016/j.cell.2012.05.036
- 342 32. Orth JD, Thiele I, Palsson BØ. What is flux balance analysis? *Nat Biotechnol. Nature Research*;  
343 2010;28: 245–248. doi:10.1038/nbt.1614
- 344 33. Schuetz R, Zamboni N, Zampieri M, Heinemann M, Sauer U. Multidimensional optimality of  
345 microbial metabolism. *Science (80- )*. 2012; doi:10.1126/science.1216882
- 346 34. Mahadevan R, Schilling CH. The effects of alternate optimal solutions in constraint-based  
347 genome-scale metabolic models. *Metab Eng*. 2003;5: 264–276.  
348 doi:10.1016/j.ymben.2003.09.002
- 349 35. Oliveira AP, Dimopoulos S, Busetto AG, Christen S, Dechant R, Falter L, et al. Inferring causal  
350 metabolic signals that regulate the dynamic TORC1-dependent transcriptome. *Mol Syst Biol*.  
351 2015; doi:10.15252/msb.20145475
- 352 36. Oliveira AP, Ludwig C, Zampieri M, Weisser H, Aebersold R, Sauer U. Dynamic  
353 phosphoproteomics reveals TORC1-dependent regulation of yeast nucleotide and amino acid  
354 biosynthesis. *Sci Signal*. 2015; doi:10.1126/scisignal.2005768
- 355 37. Touati SA, Kataria M, Jones AW, Snijders AP, Uhlmann F. Phosphoproteome dynamics during  
356 mitotic exit in budding yeast. *EMBO J*. 2018; doi:10.15252/embj.201798745
- 357 38. Kelliher CM, Leman AR, Sierra CS, Haase SB. Investigating Conservation of the Cell-Cycle-  
358 Regulated Transcriptional Program in the Fungal Pathogen, *Cryptococcus neoformans*. *PLoS*  
359 *Genet*. 2016; doi:10.1371/journal.pgen.1006453
- 360 39. Amoutzias GD, He Y, Gordon J, Mossialos D, Oliver SG, Van de Peer Y. Posttranslational  
361 regulation impacts the fate of duplicated genes. *Proc Natl Acad Sci*. 2010;  
362 doi:10.1073/pnas.0911603107
- 363 40. Soares NC, Spät P, Krug K, MacEk B. Global dynamics of the *Escherichia coli* proteome and  
364 phosphoproteome during growth in minimal medium. *J Proteome Res*. 2013;  
365 doi:10.1021/pr3011843
- 366 41. Houser JR, Barnhart C, Boutz DR, Carroll SM, Dasgupta A, Michener JK, et al. Controlled  
367 Measurement and Comparative Analysis of Cellular Components in *E. coli* Reveals Broad  
368 Regulatory Changes in Response to Glucose Starvation. *PLoS Comput Biol*. 2015;  
369 doi:10.1371/journal.pcbi.1004400
- 370 42. Weinert BT, Iesmantavicius V, Wagner SA, Schölz C, Gummesson B, Beli P, et al. Acetyl-  
371 phosphate is a critical determinant of lysine acetylation in *E. coli*. *Mol Cell*. 2013;51: 265–272.
- 372 43. Humphrey SJ, James DE, Mann M. Protein Phosphorylation: A Major Switch Mechanism for  
373 Metabolic Regulation. *Trends in Endocrinology and Metabolism*. 2015.  
374 doi:10.1016/j.tem.2015.09.013
- 375 44. Choi KR, Jang WD, Yang D, Cho JS, Park D, Lee SY. Systems Metabolic Engineering  
376 Strategies: Integrating Systems and Synthetic Biology with Metabolic Engineering. *Trends in*  
377 *Biotechnology*. 2019. doi:10.1016/j.tibtech.2019.01.003
- 378 45. Orth JD, Conrad TM, Na J, Lerman JA, Nam H, Feist AM, et al. A comprehensive genome-scale  
379 reconstruction of *Escherichia coli* metabolism--2011. *Mol Syst Biol*. 2011/10/13. 2011;7: 535.  
380 doi:10.1038/msb.2011.65



- 381 46. Becker SA, Feist AM, Mo ML, Hannum G, Palsson BO, Herrgard MJ. Quantitative prediction of  
382 cellular metabolism with constraint-based models: the COBRA Toolbox. *Nat Protoc.* 2007/04/05.  
383 2007;2: 727–738. doi:nprot.2007.99 [pii]10.1038/nprot.2007.99
- 384 47. Schellenberger J, Lewis NE, Palsson B. Elimination of thermodynamically infeasible loops in  
385 steady-state metabolic models. *Biophys J.* 2011; doi:10.1016/j.bpj.2010.12.3707
- 386 48. Lewis NE, Hixson KK, Conrad TM, Lerman JA, Charusanti P, Polpitiya AD, et al. Omic data from  
387 evolved *E. coli* are consistent with computed optimal growth from genome-scale models. *Mol*  
388 *Syst Biol.* 2010;6: 390.
- 389 49. Martínez VS, Quek LE, Nielsen LK. Network thermodynamic curation of human and yeast  
390 genome-scale metabolic models. *Biophys J.* 2014; doi:10.1016/j.bpj.2014.05.029
- 391 50. Sánchez BJ, Zhang C, Nilsson A, Lahtvee P, Kerkhoven EJ, Nielsen J. Improving the phenotype  
392 predictions of a yeast genome-scale metabolic model by incorporating enzymatic constraints.  
393 *Mol Syst Biol.* 2017; doi:10.15252/msb.20167411

394

395

396

397

398

399

400

401

402

403

404

405

406

407

408

409

410

411

412

413

414 **Supplementary Figures**

415

416

417

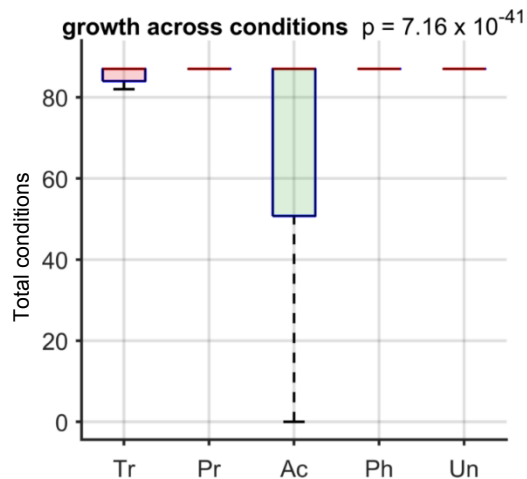

418

419

420 **S. Figure 1.** Distribution of regulation based on gene essentiality across 87 different conditions. These  
421 conditions comprise 56 different carbon sources including glucose, and 31 different nitrogen sources  
422 including ammonium ions. The total number of conditions in which each gene deletion was viable was  
423 calculated. This total number was then compared between targets of each regulatory mechanism. The  
424 box plots show that acetylation preferentially regulates the genes that impact growth across the 87  
425 conditions. The box plot whiskers extend to the 99.3<sup>rd</sup> percentile of each distribution. The ANOVA p-  
426 value comparing the means is  $7.1 \times 10^{-41}$ .

427

428

429

430

431

432

433

434

435

436

437

438

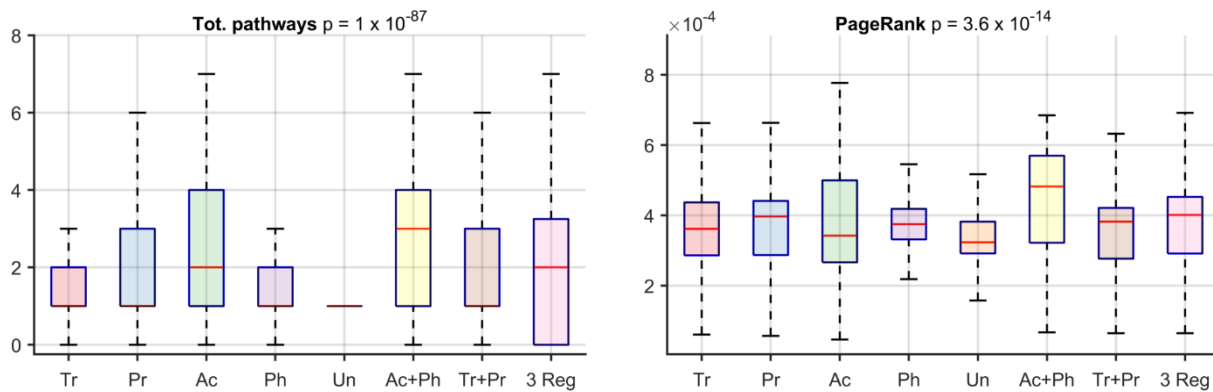

439

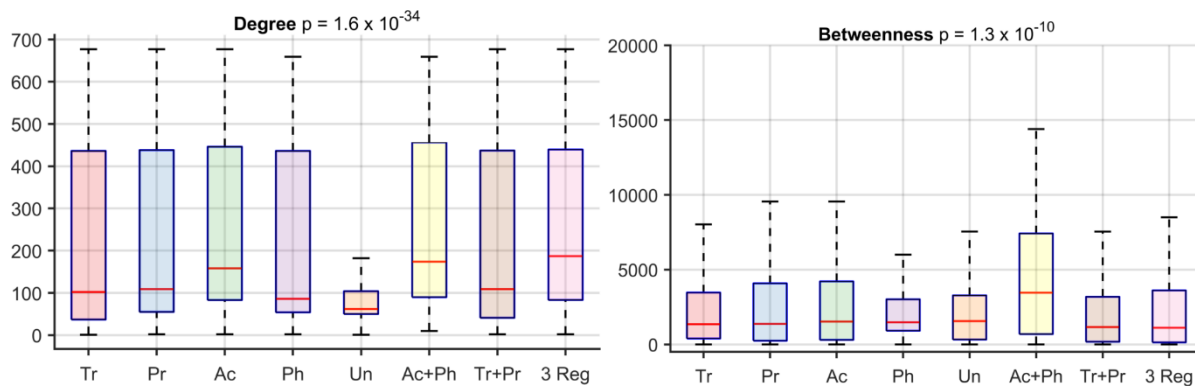

440

**S. Figure 2.** Distribution of regulation based on topological properties of each reaction. Four different  
441 topological properties are shown in the box plots - the total number of annotated pathways each  
442 reaction participates (Tot. pathways), the number of times each reaction is traversed during a random  
443 walk between reactions in the network (PageRank), the total number of connected reactions (Degree)  
444 and the number of times each reaction appears on a shortest path between two reactions  
445 (Betweenness). These show that reactions that are regulated by any mechanism have a higher  
446 connectivity compared to those that are unregulated. Furthermore, reactions regulated by both  
447 acetylation and phosphorylation had the highest connectivity across all metrics. The ANOVA p-value  
448 comparing the means is provided in the title. (Abbreviations: regulation by both transcription and post-  
449 transcription (Tr + Pr), both acetylation and phosphorylation (Ac + Ph), at least 3 regulators (3 Reg),  
450 and Unregulated (Un)).

451

452

453

454

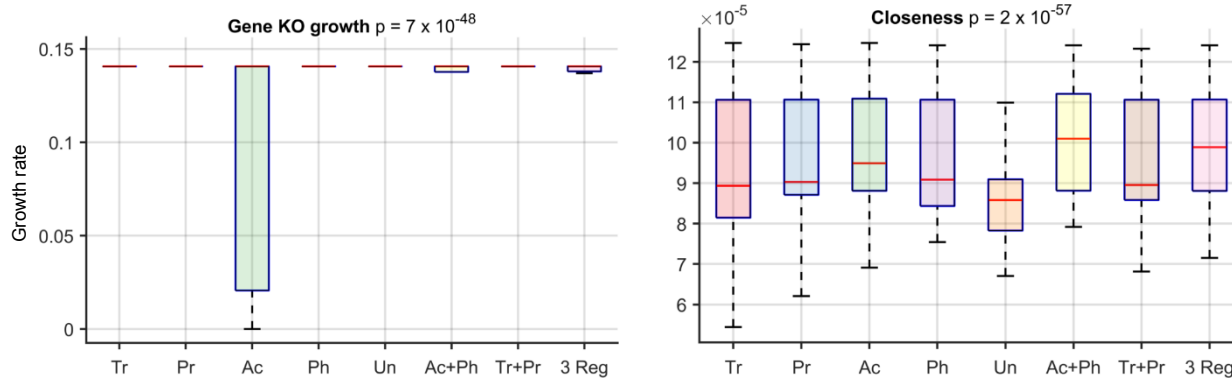

455

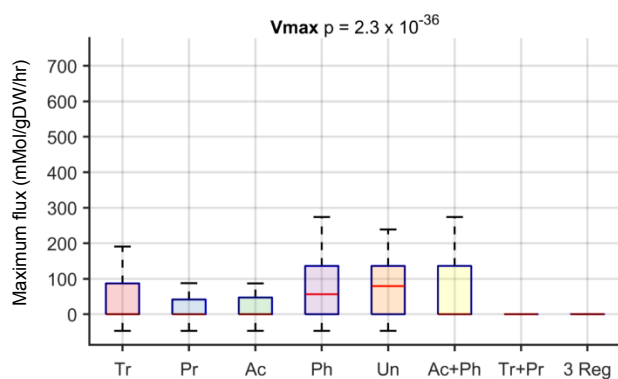

456 **S. Figure 3.** Properties of reactions regulated by multiple mechanisms. The box plots compare the  
 457 properties of enzymes regulated by transcription, post-transcription, acetylation, phosphorylation with  
 458 those regulated by both transcription and post-transcription (Tr + Pr), both acetylation and  
 459 phosphorylation (Ac + Ph), or at least 3 regulators (3 Reg). This set of combinations among regulators  
 460 was chosen as both acetylation and phosphorylation are PTMs, and the transcriptome and proteome of  
 461 yeast cells show significant correlation. Reactions regulated by both acetylation and phosphorylation  
 462 had the highest connectivity as measured by the inverse sum of the distance from a reaction to all other  
 463 reactions in the network (Closeness). Apart from connectivity, reactions regulated by two different  
 464 mechanisms did not share properties of reactions regulated by each individual mechanism. For  
 465 example, reactions regulated by acetylation and phosphorylation were not likely to be essential or have  
 466 high maximum flux. The ANOVA p-value comparing the means is provided in the title.

467

468

469

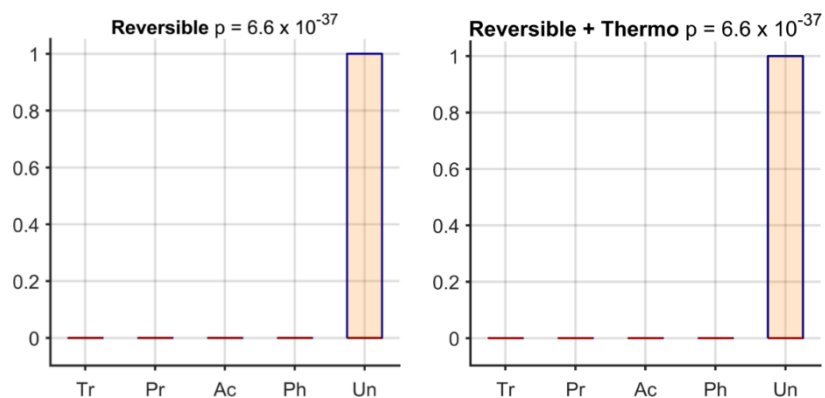

470

471 **S. Figure 4.** The box plots show the distribution of regulation based on reaction reversibility. Reversible  
472 reactions were highly likely to be not regulated by any of the four mechanisms. The left panel compares  
473 the distribution of regulation of reversible reactions based on the annotation from the Yeast 7 model  
474 (reversible reactions are set to 1 and irreversible reactions are set to 0). The panel on the right uses an  
475 updated list based on thermodynamic analysis of the Yeast metabolic model by Martinez *et al* [49].

476

477

478

479

480

481

482

483

484

485

486

487

488

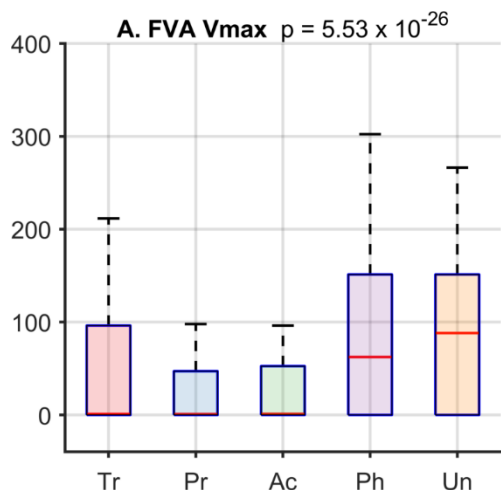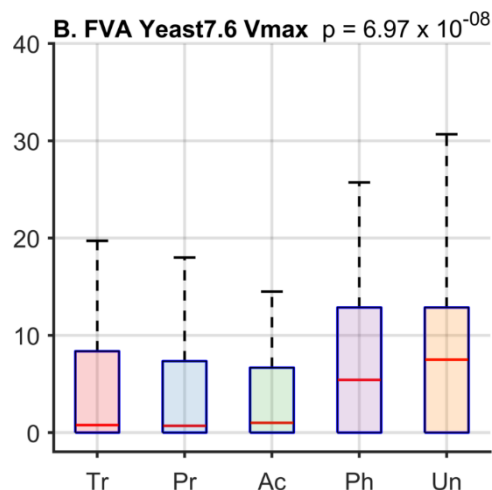

489

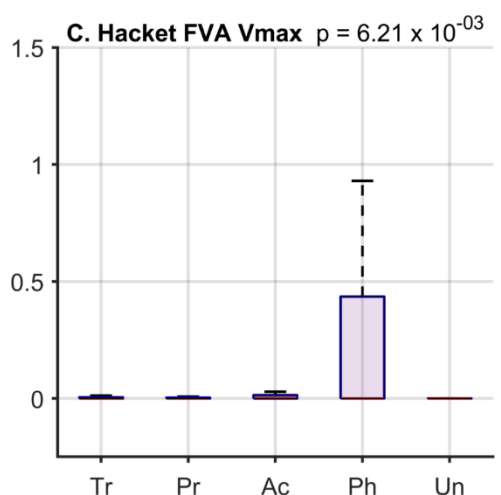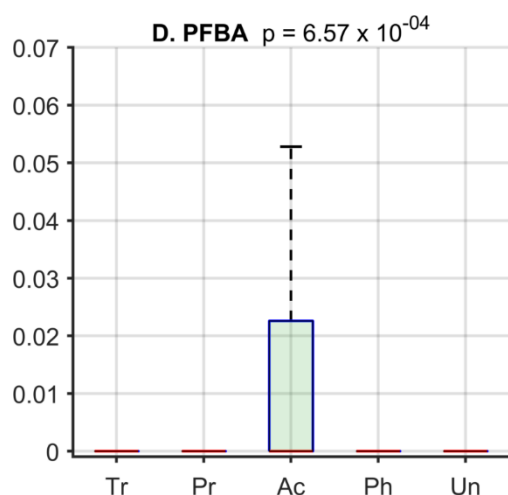

490

**E.**

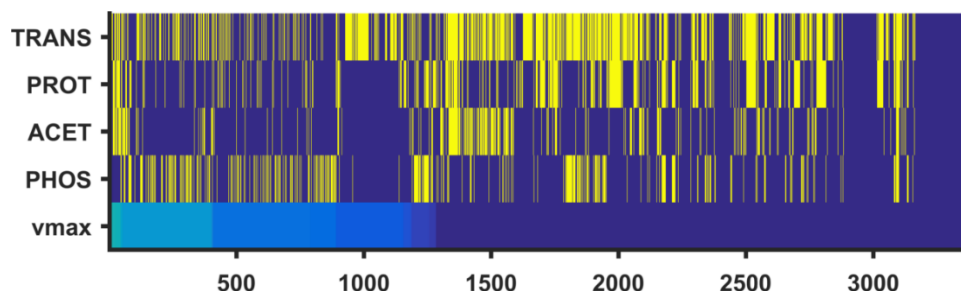

491

492 **S. Figure 5.** Distribution of regulation based on magnitude of maximum possible flux (mmol/gDW/hr)  
 493 through each reaction. The plots compare the distribution of regulation using flux calculated using  
 494 various methods and models. The ANOVA p-value comparing the means is provided in the panel title of  
 495 each plot. These results show that phosphorylated reactions are highly enriched among those reactions  
 496 with high maximum flux. **A.** Maximum flux through each reaction was calculated using FVA using the  
 497 Yeast 7 model without assuming that cells maximize their biomass (the default objective in FVA and  
 498 FBA). The box plots compare the maximum flux value of reactions regulated by each mechanism. **B.**  
 499 Maximum flux through each reaction was calculated using FVA without assuming that cells maximize  
 500 their biomass using the Yeast 7.6 model (Yeast 7 model was used for all analyses). **C.** The flux through



501 the model was first fit to the experimentally inferred flux data from Hackett *et al*[21]. The maximum flux  
502 through all reactions was then determined using FVA. **D.** The flux through each reaction was inferred  
503 from Parsimonious FBA (PFBA). Note that PFBA does not provide the maximum flux but the flux value  
504 that minimizes the sum of flux through all reactions while maximizing the biomass objective. Hence it  
505 does not reveal any futile cycles or redundancy in the network. **E.** The heatmap shows the distribution  
506 of regulation based on magnitude of maximum possible flux (Vmax) through of each reaction.  
507 Reactions are sorted based on Vmax inferred from FVA. The columns correspond to each reaction-  
508 gene pair. Those that are regulated by each mechanism are shown in yellow, while those that are not  
509 regulated by a specific mechanism are in blue.

510

511

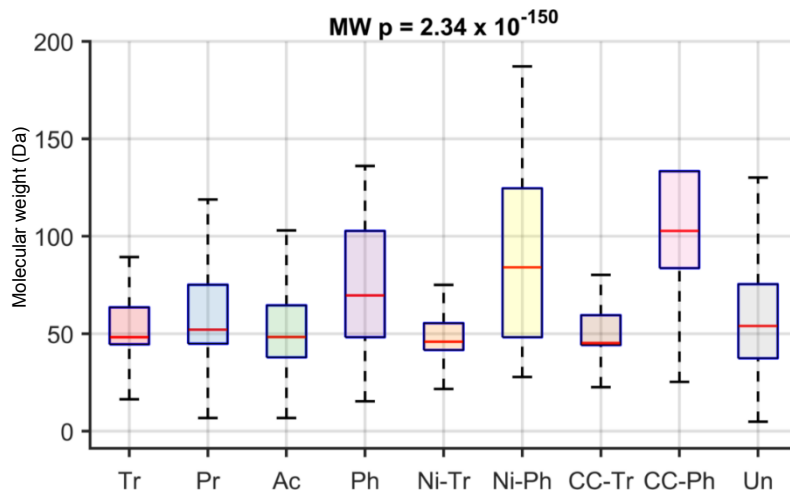

512

513 **S. Figure 6.** The box plots show the distribution of regulation in Yeast based on enzyme molecular  
514 weight. Enzymes regulated by phosphorylation on average tended to have high molecular weight. Data  
515 for targets of phosphorylation and transcriptional regulation in Nitrogen starvation (denoted by 'Ni\_'  
516 prefix) and Cell cycle (denoted by 'CC\_' prefix) conditions are also shown for comparison.

517

518

519

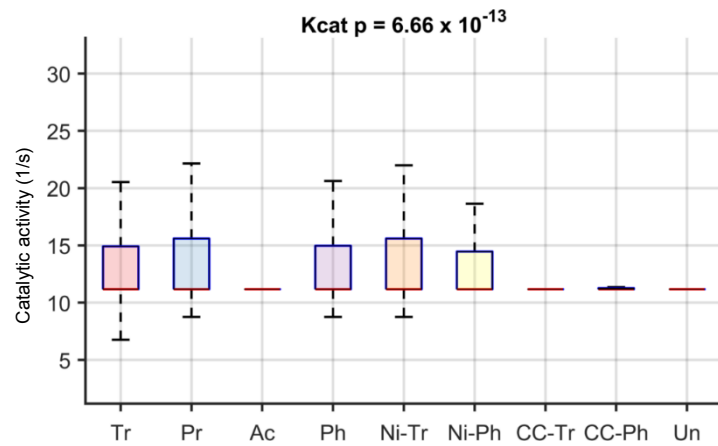

520

521

522 **S. Figure 7.** The box plots show the distribution of regulation based on enzyme catalytic activity (kcat)  
523 in Yeast (data from Sanchez *et al* [50]). No consistent difference across datasets was observed in  
524 regulation based on the catalytic activity of the target enzyme.

525

526

527

528

529

530

531

532

533

534

535

536

537

538

539

540

541

542

543

544

545 **Supplementary Tables**

546 **A**

| Regulatory mechanisms |      | Reaction Overlap | p-value                |
|-----------------------|------|------------------|------------------------|
| TRANS                 | PROT | 421              | $4.12 \times 10^{-30}$ |
| TRANS                 | ACET | 285              | $2.36 \times 10^{-19}$ |
| TRANS                 | PHOS | 266              | 0.241723               |
| PROT                  | ACET | 133              | $8.53 \times 10^{-05}$ |
| PROT                  | PHOS | 117              | 0.925481               |
| ACET                  | PHOS | 89               | 0.420549               |

547

548 **B**

| Regulatory mechanisms |      | Gene Overlap | p-value  |
|-----------------------|------|--------------|----------|
| TRANS                 | PROT | 153          | 0.010941 |
| TRANS                 | ACET | 157          | 0.001552 |
| TRANS                 | PHOS | 61           | 0.931005 |
| PROT                  | ACET | 69           | 0.925509 |
| PROT                  | PHOS | 42           | 0.291789 |
| ACET                  | PHOS | 34           | 0.860463 |

549

550 **C**

| Total regulators | Percentage among those regulated |
|------------------|----------------------------------|
| 2 or more        | 47.8%                            |
| 3 or more        | 8.7%                             |
| All 4            | 0.08%                            |

551

552 **S. Table 1.** Overlap between targets of various mechanisms - transcription (TRANS), post-transcription  
553 (PROT), acetylation (ACET), phosphorylation (PHOS). This reveals low overlap between targets of  
554 regulation by phosphorylation and other mechanisms. **A.** Overlap between target reactions **B.** Overlap  
555 between target genes. **C.** Percentage of reactions regulated by multiple mechanisms. Overall, 69% of  
556 the gene-associated reactions in the model were regulated; among those regulated, 47.8% were  
557 regulated by more than one mechanism.

558

559 **S. Table 2.** Essential reactions regulated by acetylation ([Spreadsheet file](#))

560

561 **S. Table 3.** Top 50 reactions sorted based on topological connectivity ([Spreadsheet file](#))

562

563 **S. Table 4.** Top 50 reactions with maximum reaction flux regulated by phosphorylation ([Spreadsheet](#)  
564 [file](#))

565

| Regulation                   | <i>E. coli</i> | <i>S. cerevisiae</i> |
|------------------------------|----------------|----------------------|
| Transcription                | 469            | 468                  |
| Post-transcription/Proteomic | 372            | 266                  |
| Acetylation                  | 460            | 265                  |
| Phosphorylation              | 17             | 133                  |

566

567 **S. Table 5.** Comparison of total genes regulated by each process in *E. coli* with *S. cerevisiae* shows  
568 that phosphorylation plays a relatively minor role in *E. coli* metabolic regulation during stationary phase.

569

570

| Regulatory mechanisms |       | p-value                | Reaction Overlap |
|-----------------------|-------|------------------------|------------------|
| TRANS                 | PROT  | $3.77 \times 10^{-23}$ | 590              |
| ACET                  | TRANS | 0.042022               | 442              |
| ACET                  | PROT  | 0.192068               | 379              |
| ACET                  | PHOS  | $5.60 \times 10^{-11}$ | 28               |
| PHOS                  | TRANS | 0.004853               | 22               |
| PHOS                  | PROT  | 0.95148                | 9                |

571

572 **S. Table 6.** Overlap between targets of various mechanisms in *E. coli* - transcription (TRANS), post-  
573 transcription (PROT), acetylation (ACET), phosphorylation (PHOS).

574

575

576 **S. Table 7.** Gaps in regulation – Essential genes that are unregulated. One representative reaction is  
577 shown for each gene in case there are multiple reactions associated with it ([Spreadsheet file](#))

578

579

| Model                       | Yeast 7 (default)      |                        | Yeast 7.6              |                        |
|-----------------------------|------------------------|------------------------|------------------------|------------------------|
|                             | ANOVA                  | Kruskal-Wallis         | ANOVA                  | Kruskal-Wallis         |
| p-value                     |                        |                        |                        |                        |
| Growth rate                 | $2.07 \times 10^{-41}$ | $1.24 \times 10^{-29}$ | $7.82 \times 10^{-43}$ | $1.37 \times 10^{-47}$ |
| Closeness                   | $3.33 \times 10^{-48}$ | $1.74 \times 10^{-55}$ | $1.66 \times 10^{-39}$ | $3.61 \times 10^{-51}$ |
| Vmax (without max. biomass) | $5.53 \times 10^{-26}$ | $9.25 \times 10^{-13}$ | $6.97 \times 10^{-8}$  | $1.30 \times 10^{-11}$ |

580

581 **S. Table 8.** Robustness of the results comparing the difference in distribution of properties between  
582 targets of various regulatory mechanisms using the Yeast 7.6 model. Significance of results using the  
583 non-parametric Kruskal-Wallis test is also shown. The p-values for the key reaction features shown in  
584 Figure 1 using the Yeast 7 model is provided as comparison. All p-values are significant at FDR < 0.01  
585 using both Bonferroni adjustment and Benjamin-Hochberg multiple hypothesis correction.

586

587

| Model       | All genes (default)    |                        | All expressed genes   |                       |
|-------------|------------------------|------------------------|-----------------------|-----------------------|
|             | ANOVA                  | Kruskal-Wallis         | ANOVA                 | Kruskal-Wallis        |
| Growth rate | $2.07 \times 10^{-41}$ | $1.24 \times 10^{-29}$ | $3.3 \times 10^{-41}$ | $2.1 \times 10^{-29}$ |
| Closeness   | $3.33 \times 10^{-48}$ | $1.74 \times 10^{-55}$ | $2.2 \times 10^{-49}$ | $3.5 \times 10^{-56}$ |
| Vmax        | $1.59 \times 10^{-26}$ | $2.51 \times 10^{-21}$ | $8.1 \times 10^{-27}$ | $1.3 \times 10^{-21}$ |

588

589 **S. Table 9.** Robustness of the results after removing genes that are not-expressed (i.e. not detected in  
590 RNA-seq data) in both exponential and stationary phase cultures. The p-values reported in Figure 1  
591 using all the metabolic genes in the Yeast 7 model is provided as comparison.

592

593

594

| Model       | Murphy <i>et al</i> (default) |                        | Weinert <i>et al</i>   |                        |
|-------------|-------------------------------|------------------------|------------------------|------------------------|
|             | ANOVA                         | Kruskal-Wallis         | ANOVA                  | Kruskal-Wallis         |
| Growth rate | $2.07 \times 10^{-41}$        | $1.24 \times 10^{-29}$ | $1.59 \times 10^{-37}$ | $2.63 \times 10^{-33}$ |
| Closeness   | $3.33 \times 10^{-48}$        | $1.74 \times 10^{-55}$ | $3.10 \times 10^{-44}$ | $1.62 \times 10^{-48}$ |
| Vmax        | $1.59 \times 10^{-26}$        | $2.51 \times 10^{-21}$ | $1.71 \times 10^{-22}$ | $1.94 \times 10^{-19}$ |

595

596 **S. Table 10.** Comparison of results using proteomics data from Weinert *et al* instead of Murphy *et al*.  
597 The ANOVA p-value comparing the means are provided. The p-values reported in Figure 1 using  
598 Murphy *et al* data is provided as comparison.

599

600

601

| Fold change              | 2 (default)            | 1.5                    | 3                      | 4                      |
|--------------------------|------------------------|------------------------|------------------------|------------------------|
| Growth rate              | $2.07 \times 10^{-41}$ | $3.72 \times 10^{-35}$ | $1.12 \times 10^{-34}$ | $5.82 \times 10^{-26}$ |
| Closeness                | $3.33 \times 10^{-48}$ | $2.09 \times 10^{-47}$ | $1.13 \times 10^{-32}$ | $6.95 \times 10^{-20}$ |
| Vmax (with max. biomass) | $1.59 \times 10^{-26}$ | $6.97 \times 10^{-24}$ | $1.26 \times 10^{-23}$ | $1.01 \times 10^{-19}$ |

602

| Top Percentile           | 25 (default)           | 50                     | 15                     | 5                      |
|--------------------------|------------------------|------------------------|------------------------|------------------------|
| Growth rate              | $2.07 \times 10^{-41}$ | $1.42 \times 10^{-42}$ | $2.49 \times 10^{-39}$ | $2.71 \times 10^{-40}$ |
| Closeness                | $3.33 \times 10^{-48}$ | $1.86 \times 10^{-41}$ | $7.15 \times 10^{-55}$ | $9.66 \times 10^{-48}$ |
| Vmax (with max. biomass) | $1.59 \times 10^{-26}$ | $6.07 \times 10^{-18}$ | $5.66 \times 10^{-31}$ | $8.98 \times 10^{-36}$ |

603

604 **S. Table 11.** Comparison of thresholds used for identifying differentially expressed genes and proteins.  
605 These show that our results are robust to the thresholds for identifying the targets of various regulatory  
606 mechanisms. The ANOVA p-value comparing the means are provided. Note that the first table uses  
607 fold change thresholds for transcriptomics, acetylation and phospho-proteomics data alone. Since the

608 proteomics data uses a percentile cut off, the robustness analysis for this data was performed  
609 separately.

610

611

| Threshold for unconstrained reactions | ANOVA p-value for Vmax  |
|---------------------------------------|-------------------------|
| 100                                   | $5.07 \times 10^{-31}$  |
| 200                                   | $1.08 \times 10^{-57}$  |
| 300                                   | $5.27 \times 10^{-50}$  |
| 400                                   | $3.53 \times 10^{-27}$  |
| 500                                   | $2.24 \times 10^{-25}$  |
| 600                                   | $2.24 \times 10^{-25}$  |
| 700                                   | $2.24 \times 10^{-25}$  |
| 800                                   | $1.59 \times 10^{-26}$  |
| 900                                   | $1.59 \times 10^{-26}$  |
| 1000                                  | $4.68 \times 10^{-150}$ |

612

613 **S. Table 12.** Comparison of thresholds used for identifying unconstrained reactions from FVA.  
614 Reactions with maximal flux above the threshold listed in the table were assumed to be unconstrained  
615 and were excluded from the analysis, as they are likely due to thermodynamically infeasible internal  
616 cycles. The ANOVA p-value comparing the means of the maximum flux through the target reactions of  
617 different regulatory mechanisms is provided. The default value (900 mmol/gDW/hr) for eliminating  
618 unconstrained reactions is highlighted and was used for all analyses. These show that our results are  
619 robust to the thresholds for identifying unconstrained reactions.

620

621 **S. Table 13.** Raw dataset containing all yeast genes and associated reactions, the corresponding  
622 regulators, and the reaction properties ([Spreadsheet file](#)).

623
