# 1 Metabolic signatures of regulation by phosphorylation and acetylation

2 Kirk Smith<sup>1</sup>, Fangzhou Shen<sup>1</sup>, Ho Joon Lee<sup>3,4</sup>, Sriram Chandrasekaran<sup>1,2,\*</sup>

3 <sup>1</sup> - Department of Biomedical Engineering, <sup>2</sup> - Center for Computational Medicine and Bioinformatics,  
 4 University of Michigan, Ann Arbor, MI, USA, 48109; <sup>3</sup> - Department of Genetics, <sup>4</sup> - Yale Center for  
 5 Genome Analysis, Yale University, New Haven, CT 06510, USA

6 \* - Correspondence: [csriram@umich.edu](mailto:csriram@umich.edu)

## 7 Abstract

8 Acetylation and phosphorylation are highly conserved post-translational modifications (PTMs)  
 9 that regulate cellular metabolism, yet how metabolic control is shared between these PTMs is  
 10 unknown. Here we analyze transcriptome, proteome, acetylome, and phosphoproteome  
 11 datasets in *E.coli*, *S.cerevisiae*, and mammalian cells across diverse conditions using CAROM,  
 12 a new approach that uses genome-scale metabolic networks and machine-learning to classify  
 13 regulation by PTMs. We built a single machine-learning model that accurately distinguished  
 14 reactions controlled by each PTM in a condition across all three organisms based on reaction  
 15 attributes (AUC>0.8). Our model uncovered enzymes regulated by phosphorylation during a  
 16 mammalian cell-cycle, which we validate using phosphoproteomics. Interpreting the machine-  
 17 learning model using game-theory uncovered enzyme properties including network connectivity,  
 18 essentiality, and condition-specific factors such as maximum flux that differentiate regulation by  
 19 phosphorylation from acetylation. The conserved and predictable partitioning of metabolic  
 20 regulation identified here between these PTMs can enable rational engineering of regulatory  
 21 circuits.

## 22 Graphical Abstract

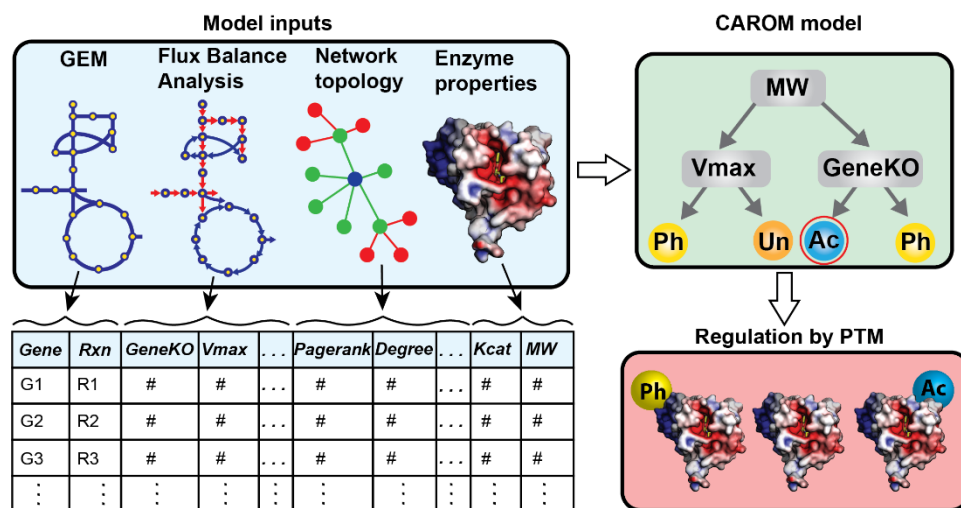

## 25 Introduction

26 A key challenge in systems biology is to predict how various regulatory processes orchestrate  
 27 cellular response to perturbations. Numerous mechanisms regulate metabolic response to new  
 28 environments [1–8]. Nevertheless, it is unclear why or when some enzymes are regulated by

29 acetylation while others through PTMs such as phosphorylation [3,4]. Several advantages of  
30 regulation by PTMs have been proposed over the past five decades [9–11]. These include low  
31 energy requirements, rapid response, and signal amplification. Yet these characteristics do not  
32 differentiate between PTMs such as acetylation and phosphorylation. The staggering complexity  
33 of each regulatory process has limited the comparative analysis of metabolic regulation at a  
34 systems level [3]. Existing studies have focused on a single regulatory process, usually  
35 transcriptional regulation [4,12–20]. Such studies have revealed reaction reversibility and  
36 metabolic network structure to be predictive of regulation [8,15,21–24]. Yet these studies do not  
37 shed light on the differences between each regulatory process, especially PTMs. In sum,  
38 although some general network principles of regulation are known, how it is partitioned among  
39 various regulatory mechanisms is unclear.

40 We hence developed a data-driven approach, called *Comparative Analysis of Regulators of*  
41 *Metabolism* (CAROM), to identify unique features of each PTM. CAROM achieves this by  
42 comparing various properties of metabolic enzymes, including essentiality, flux, molecular  
43 weight, and topology. It identifies properties that are more highly enriched among targets of  
44 each process than expected by chance. Using CAROM, we found features that were  
45 significantly associated with each PTM. Nevertheless, no single feature on its own is completely  
46 predictive of regulation. CAROM hence uses machine learning to uncover how features in  
47 combination influence regulation. We used CAROM to understand PTM dynamics during well-  
48 characterized fundamental processes in microbes and mammalian cells, namely the cell cycle,  
49 transition to stationary phase, and response to nutrient alterations. While we focus on  
50 acetylation and phosphorylation here as they are the most well-studied PTMs with available  
51 omics datasets, our approach can be applied to any regulatory process.

52 The manuscript is organized as follows: we first analyze various multi-omics datasets in *E. coli*,  
53 yeast and mammalian cells and reveal properties that are either enzyme-specific (molecular  
54 weight) or context-specific (flux) that correlate with regulation by each PTM. These common  
55 observations across various organisms allowed us to build a multi-organism machine-learning  
56 model that explains regulation in each condition using these features. The feature importance  
57 from CAROM is highly consistent across numerous studies in all organisms studied here. These  
58 results suggest that this approach is applicable to a wide range of model systems. CAROM can  
59 shed light on how metabolic changes impact PTMs. Proteomics surveys have found PTM sites  
60 on almost all metabolic enzymes [12,25]. A key challenge currently is the identification of  
61 condition-specific PTM sites and how they coordinately regulate metabolism in a condition  
62 [3,4,26]. Overall, CAROM provides a top-down, context-specific, enzyme property-based picture  
63 of metabolic regulation.

64

## 65 **Results**

### 66 **Comparing regulation using CAROM**

67

68 The CAROM approach takes as input a list of proteins that are the targets of one or more PTMs.  
69 CAROM analyzes the properties of the targets of PTMs in the context of a genome-scale  
70 metabolic network model. We hypothesize that target preferences of regulators can be inferred  
71 from the network topology and fluxes. CAROM compares the properties of the targets  
72 statistically using Analysis of Variance (ANOVA). It also builds a machine learning model

73 capable of classifying regulation using boosted decision trees. Overall, CAROM compares the  
74 following 13 properties:

- 75 • Impact of gene knockout on biomass production, ATP synthesis, and viability across  
76 different conditions
- 77 • Flux through the network measured through Flux Variability Analysis, Parsimonious flux  
78 balance analysis (PFBA), and reaction reversibility
- 79 • Enzyme molecular weight and catalytic activity
- 80 • Topological properties, including the total pathways each reaction is involved in, its  
81 degree, betweenness, closeness, and PageRank

82  
83 These properties were chosen based on ease of calculation using Flux Balance Analysis (FBA)  
84 and based on prior literature that have shown that hubs in the network and essential genes are  
85 frequent targets of transcriptional regulation [27]. Overall, CAROM can help interpret regulation  
86 in a condition and forecast targets of regulation using these features above. The CAROM  
87 source-code is available from the Synapse bioinformatics repository

88 <https://www.synapse.org/CAROM>

89

### 90 **Shared features of enzymes regulated by acetylation and phosphorylation in yeast**

91 We first analyzed the dynamics of metabolic regulation during a well-characterized process in  
92 yeast, namely, transition to stationary phase. We obtained RNA sequencing, time-course  
93 proteomics, acetylomics, and phospho-proteomics data from the literature [28–30]. Targets for  
94 each process were determined based on differential levels between stationary and exponential  
95 phase (Methods). We assumed that PTMs that are dynamic and conditionally regulated are  
96 likely to be functional [31].

97 Protein targets were mapped to corresponding metabolic reactions using the gene-protein-  
98 reaction annotations in the genome-scale metabolic network model of yeast [32]. There was  
99 significant overlap among reactions regulated through changes in both the transcriptome and  
100 proteome, and transcriptome and acetylome (hypergeometric p-value =  $5 \times 10^{-25}$  and  $1 \times 10^{-15}$   
101 respectively, S. Table 1). In contrast, there was little overlap between targets of phosphorylation  
102 with other mechanisms (p-value > 0.1; S. Table 1). While prior studies found higher overlap  
103 between targets of PTMs [33,34], they used all possible sites that can be acetylated or  
104 phosphorylated. However, only a fraction of PTM sites are likely to be active and functional in a  
105 single condition. Overall, each regulatory mechanism had a distinct set of targets (Figure 1A).  
106 The targets of each regulatory mechanism were then used as input to CAROM.

107 We used CAROM to find common features of enzymes that are regulated by each mechanism.  
108 We first analyzed the regulation of enzymes that are essential for growth in minimal media.  
109 Essential enzymes in the yeast metabolic model were determined using FBA. Surprisingly, this  
110 set of enzymes was highly enriched among those regulated by acetylation but not by other  
111 processes (ANOVA p-value <  $10^{-16}$ ; Figure 1B; S. Table 2). Since regulation can be optimized  
112 for fitness across multiple conditions [35], we identified enzymes that impact growth in 87  
113 different nutrient conditions comprising various carbon and nitrogen sources using FBA. This set  
114 of essential enzymes was once again enriched for acetylation relative to other mechanisms  
115 (ANOVA p-value <  $10^{-16}$ ; S. Figure 1). This trend was observed using an experimentally derived  
116 list of essential genes as well (hypergeometric p-value =  $2 \times 10^{-7}$  for acetylation). Thus, essential

117 enzymes are likely to be constitutively expressed and their activity modulated through  
118 acetylation. This may explain why transcriptional regulation has minimal impact on fluxes in  
119 central metabolism, which contain several growth-limiting enzymes [3,14].

120 We next determined the impact of reaction position in the network on its regulation. We counted  
121 the number of pathways each reaction is involved in, along with other topological metrics, such  
122 as the closeness, degree, and Page Rank. We found that the regulation of enzymes differed  
123 significantly based on network topology (Figure 1C; S. Figure 2). First, reactions with low  
124 connectivity, measured through any of the topological metrics, were highly likely to be not  
125 regulated by these mechanisms. In contrast, highly connected enzymes linking multiple  
126 pathways were more likely to be regulated by PTMs. Connectivity metrics however were unable  
127 to differentiate between the two PTMs. Interestingly, reactions regulated by both PTMs had the  
128 highest connectivity (S. Figures 2, 3). Several key hubs, such as acetyl-CoA acetyltransferase,  
129 hexokinase and phosphofructokinase are regulated by multiple mechanisms (S. Table 3).

130 We next assessed how regulation differs based on the magnitude and direction of flux through  
131 the network. We inferred the full range of fluxes possible through each reaction using flux  
132 variability analysis (FVA) [36]. Since yeast cells may not optimize their metabolism for biomass  
133 synthesis during transition to stationary phase, we also performed FVA without assuming  
134 biomass maximization. We found that reversible reactions were not regulated by any of these  
135 mechanisms (S. Figure 4). A recent study found the same trend for allosteric regulation as well  
136 [21]. However, reversibility alone did not differentiate between regulatory mechanisms.

137 Interestingly, reactions that have high predicted maximum flux ( $V_{max}$ ) from FVA, such as ATP  
138 synthase and phosphofructokinase, were predominantly regulated by phosphorylation (Figure  
139 1D; ANOVA  $p$ -value  $< 10^{-16}$ ). This set of phosphorylated reactions comprise several kinase-  
140 phosphatase pairs, enzymes that are part of loops that consume energy (“futile cycles”), or  
141 reactions that have isozymes in compartments such as vacuoles or nucleus (S. Table 4). Thus,  
142 phosphorylation in this condition selectively regulates reactions to avoid futile cycling between  
143 antagonizing reactions or those operating in different compartments. Using data from  
144 experimentally constrained fluxes from the Hackett *et al* study [21] revealed similar patterns of  
145 regulation (S. Figure 5).

146 Finally, we compared regulation based on fundamental enzyme properties: catalytic activity and  
147 molecular weight. While catalytic activity was similar across the targets of all mechanisms,  
148 targets of phosphorylation had the highest molecular weight ( $p$ -value  $< 10^{-16}$ ) (S. Figure 6).  
149 There is no correlation between molecular weight and maximum flux (Pearson’s correlation  $R =$   
150 0.02), suggesting that both maximum flux and molecular weight are likely to be independent  
151 predictors of regulation by phosphorylation.

152 To check if this pattern of regulation is observed in other conditions, we analyzed data from  
153 nitrogen starvation response and cell cycle in yeast, where both phospho-proteomics and  
154 transcriptomics data are available [37–40]. A similar trend of regulation was observed in this  
155 condition (S. Figure 6), with phosphorylation regulating isozymes and enzymes that have high  
156  $V_{max}$  (futile cycles). Overall, these results are robust to the thresholds used for finding  
157 differentially regulated sites, using data from different sources, and other modeling parameters  
158 (S. Tables 5, 6, 7, 8, 9).

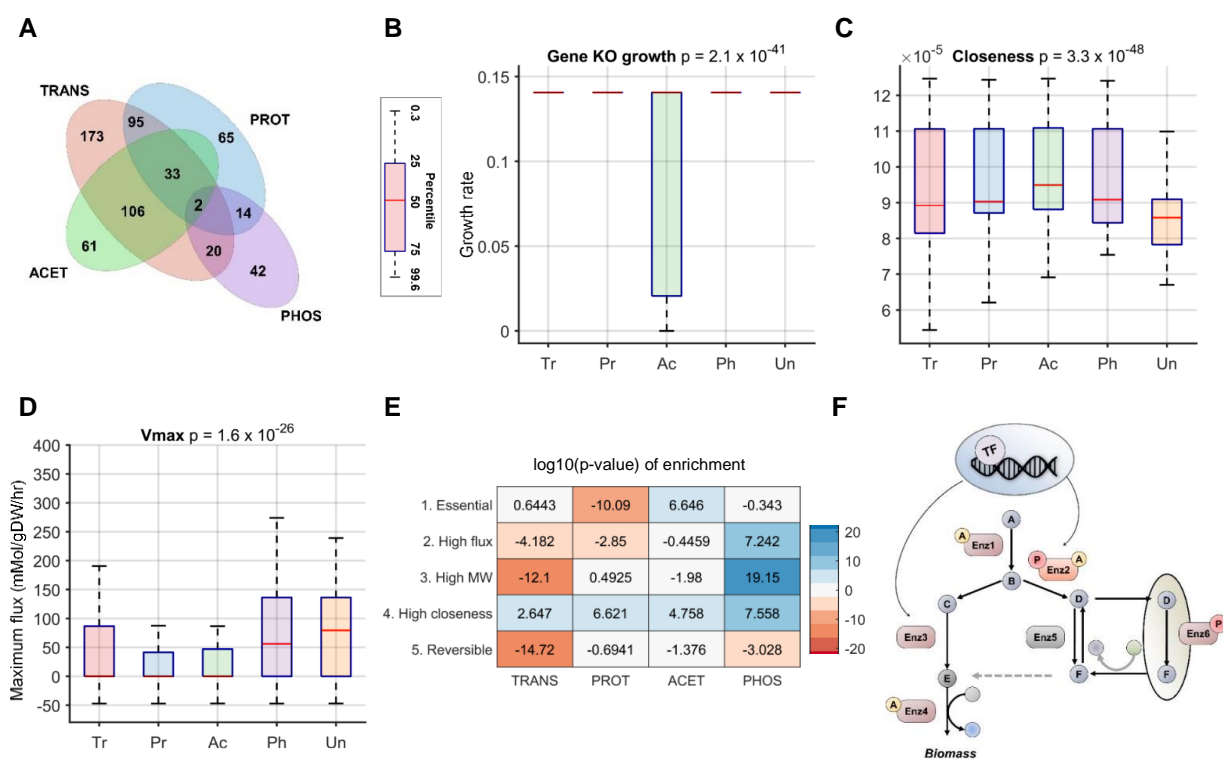

**Figure 1. Comparison of the properties of the targets of regulation in yeast.** The ANOVA p-value comparing the differences in means is shown in the title of the box plots. (Abbreviation: Enzymes regulated by transcription (Tr), post-transcription (Pr), acetylation (Ac), phosphorylation (Ph), Unregulated or unknown regulation (Un)) **A**. The Venn diagram shows the extent of overlap between targets of each process in stationary phase. Only 2 genes were found to be regulated by all four mechanisms. Targets of phosphorylation did not show any significant overlap with other mechanisms, while transcriptome and proteome showed the highest overlap (S. Table 1). **B**. Enzymes that impact growth when knocked out are highly likely to be acetylated. **C**. Enzymes with poor connectivity, as measured through the network connectivity metric - closeness, are more likely to be Unregulated. **D**. Enzymes catalyzing reactions with high maximum flux are likely to be either regulated through phosphorylation or to be unregulated. **E**. The heatmap shows the statistical enrichment (positive sign) and depletion (negative sign) of the targets of each process among reactions that are - (1) essential, (2) have high maximum flux ( $V_{max} > 75^{\text{th}}$  percentile), (3) catalyzed by enzymes with high molecular weight ( $MW > 75^{\text{th}}$  percentile), (4) highly connected (Closeness  $> 75^{\text{th}}$  percentile), and (5) reversible. **F**. A schematic pathway summarizing the division of labor in metabolic regulation. Essential reactions (Enz1 and Enz4) are preferentially acetylated; reactions in futile cycles and in different compartments (Enz6) are phosphorylated, and reactions with high connectivity are regulated through multiple mechanisms (Enz2). Reversible reactions are predominantly unregulated or regulated by unknown mechanisms (Enz5).

## 159 Context specific metabolic regulation by PTMs in *E. coli*

160 Since many mechanisms of metabolic regulation are evolutionarily conserved [3], we next  
 161 analyzed multi-omic data from *E. coli* cells during stationary phase [41–43]. By analyzing  
 162 transcriptomics, proteomics, acetylomics and phosphoproteomics data using the *E. coli*  
 163 metabolic network model, we uncovered that the pattern of regulation observed in yeast was  
 164 also observed in *E. coli* (Figure 2A-C, S. Figure 7). Essential reactions were enriched for  
 165 regulation by acetylation, and reactions with high maximum flux or large enzyme molecular  
 166 weight were enriched for regulation by phosphorylation. However, in contrast to yeast,

167 phosphorylation impacted very few metabolic genes in *E. coli*, and may play a relatively minor  
168 role in this specific context. Phosphorylation had 20-fold fewer targets compared to other  
169 mechanisms, and its targets overlapped significantly with other processes (S. Tables 10, 11).  
170 Interestingly, the number of reactions with high maximum flux was considerably lower in *E. coli*  
171 compared to yeast (1282 in Yeast and 100 in *E. coli*), which correlates with the difference in  
172 phosphorylation between the species.

173 Regulation by acetylation and phosphorylation are strongly associated with factors such as  
174 reaction flux and essentiality that change significantly between conditions. To further understand  
175 the condition-specific regulation of enzymes by PTMs, we used data from the Schmidt *et al*  
176 study that measured PTM levels for a small set of proteins in *E. coli* [44]. From this dataset we  
177 used 11 growth conditions in distinct nutrient sources that could be modeled using FBA. We  
178 selected 10 and 5 proteins, which were both part of the metabolic model and had acetylation  
179 and phosphorylation data, respectively. Despite the small sample size, we found that enzymes  
180 that impact biomass when deleted using FBA were more likely to be regulated by acetylation in  
181 that condition (p-value = 0.02; Figure 2D). This trend was also observed using experimental  
182 gene essentiality data from transposon mutagenesis screens (TN-seq) across these growth  
183 conditions (Figure 2E). For example, isocitrate lyase (*aceA*) show a consistent increase in  
184 acetylation as it becomes more essential (S. Figure 8, 9). Similarly, we observed a significant  
185 association between phosphorylation levels and the maximal flux through a reaction in each  
186 condition (Figure 2F). For example, phosphorylation of isocitrate dehydrogenase (*icd*) increased  
187 up to 20-fold in conditions with the highest maximal flux (S. Figure 10).

188 These results suggest that the metabolic features like essentiality and flux are predictive of both  
189 the regulation of different enzymes in a condition and for the same enzyme between conditions.  
190 Nevertheless, even though the maximal reaction flux and essentiality were associated with  
191 regulation by PTMs for many proteins in both organisms, there were exceptions that did not  
192 show this trend, suggesting that various factors identified earlier likely influence regulation by  
193 PTMs in a combinatorial fashion.

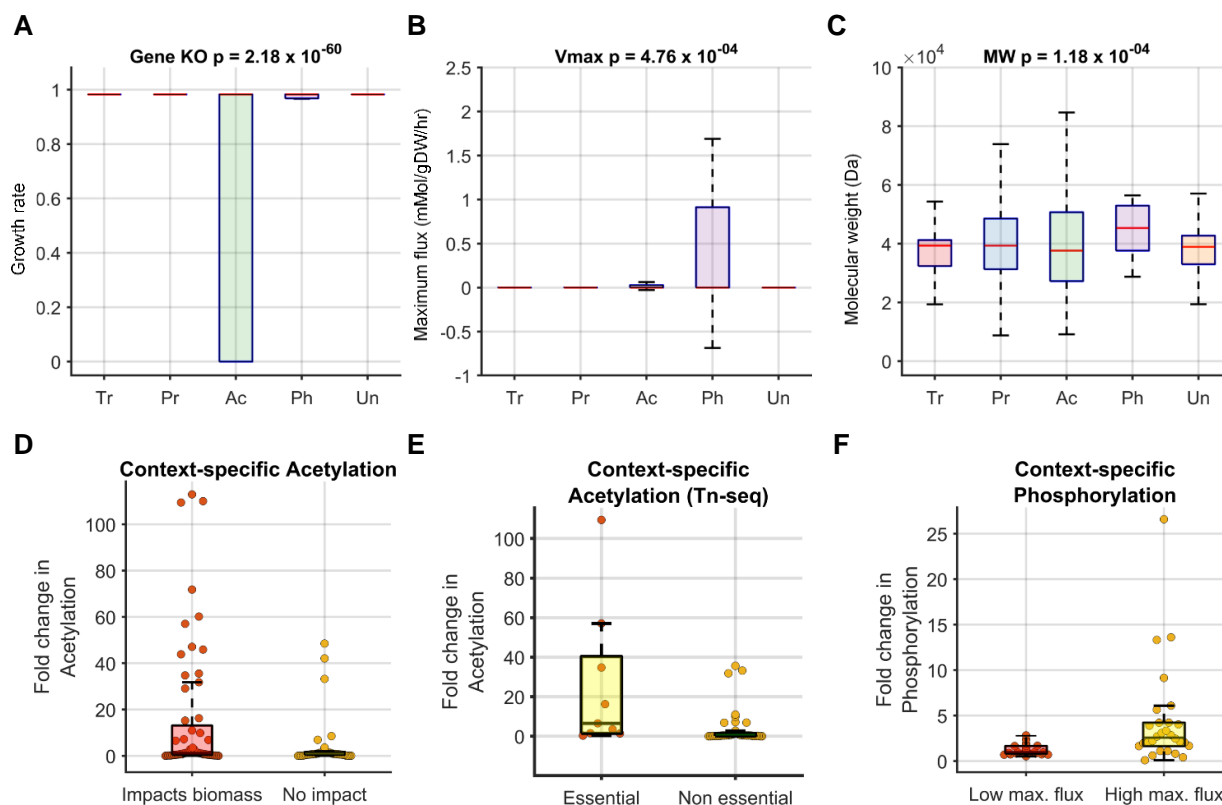

194

195 **Figure 2. Comparison of the properties of enzymes in *E. coli* regulated by transcription (Tr), post-**  
 196 **transcription (Pr), acetylation (Ac), phosphorylation (Ph) or Unregulated/Unknown regulation (Un) during**  
 197 **transition to stationary phase. Similar to yeast, reaction essentiality (A), maximum flux (B) and molecular weight**  
 198 **(C) are predictive of regulation by acetylation and phosphorylation (Vmax, MW) respectively. Proteins that were**  
 199 **found to be conditionally essential (growth < wild type glucose) based on FBA (D) or Transposon sequencing (Z-**  
 200 **score < -2) (E) were more likely to be acetylated (p-value = 0.02 & 0.0011 for FBA and Tn-seq respectively). F.**  
 201 **Enzymes that are predicted to have high maximal flux (Vmax > 90<sup>th</sup> percentile) in a condition were likely to be**  
 202 **phosphorylated compared to those with low maximal flux (p-value = 0.008).**

203

## 204 **Classifying metabolic regulation by PTMs using CAROM**

205 While our statistical analysis has revealed the impact of various metabolic features on regulation  
 206 by PTMs, each feature on its own is a weak predictor. We next sought to uncover how these  
 207 features in combination determine the regulation of each enzyme. We used machine-learning  
 208 (ML) to build a CAROM model that accounts for all these features and quantifies their  
 209 interrelationship in influencing regulation by PTMs. While metabolic network models are more  
 210 mechanistic, ML methods outperform metabolic models in prediction tasks [45]. Integrating  
 211 metabolic network outputs with ML can enable mechanistic interpretation without compromising  
 212 predictive accuracy [46,47]. We used the decision trees ML algorithm in CAROM due to its ease  
 213 of interpretation and created an ensemble of decision trees using the XGBoost framework [48].

214 We re-analyzed the *E. coli* and yeast genome-wide omics datasets using CAROM. We further  
 215 augmented this with phosphorylation and acetylation datasets from HeLa cells to assess if  
 216 similar pattern of PTM regulation exists in mammalian cells. Time course acetylation data was

217 taken from the Kori *et al* study [49], which identified 702 proteins whose acetylation levels  
218 changed significantly over time (Mann-Kendall test p-value < 0.05). Similarly, time course  
219 phosphorylation data from HeLa cells undergoing mitosis were obtained from Olsen *et al* [50].

220 We created a single CAROM model using data from all organisms with the goal of identifying  
221 conserved patterns of PTM regulation. A ternary classification algorithm was built to identify  
222 proteins that are regulated by acetylation, phosphorylation or were not regulated by these  
223 PTMs. The input to CAROM was the list of 13 features (Methods; Figure 3A, 3B). The model  
224 was trained using known examples of proteins that were regulated by each of the PTMs. The  
225 trained CAROM model was then used to predict the regulators of new proteins based on their  
226 feature values.

227  
228 The trained CAROM model showed very high accuracy in predicting proteins that are regulated  
229 by each PTM in all three systems based on five-fold cross-validation, wherein a portion of the  
230 dataset (20%) is hidden from the model. We used a range of metrics to quantify accuracy  
231 including the Matthews Correlation Coefficient (MCC), the F1 score, precision, and recall. The  
232 ML models performed accurately based on all these metrics and significantly better than  
233 random shuffling of the data (Figure 3C).

234  
235 To test the generalizability of this approach in novel conditions, we used the model to predict  
236 phosphorylation during a mammalian cell cycle. We used time-course phosphoproteome data  
237 for the first cell cycle from a murine lymphocyte cell line in response to a cytokine activation  
238 (Methods). We focused on the cell cycle as it is a fundamental process and is known to involve  
239 coordination of kinases and phosphorylase cascades [51]. Importantly, this model system was  
240 previously used by Lee *et al* to measure metabolomics changes during the cell cycle [52].  
241 Phospho-proteomes were obtained at the same time points as the metabolomics data from the  
242 Lee *et al* study. We used the extracellular and intracellular metabolomics data from the Lee *et al*  
243 study to build metabolic models for each phase of the cell cycle. We used the DFA approach, a  
244 variation of dynamic FBA, to fit the rate of change of metabolites in FBA to experimental  
245 measurements from time course metabolomics [53,54]. We used this approach to create four  
246 different models corresponding to different phases of the cell cycle (G0, G1, G1-S and G2/M)  
247 (S. Figure 11, Methods).

248  
249 The feature data (i.e., fluxes, topology) from the phase-specific metabolic models were used as  
250 input for the CAROM model to predict reactions regulated by phosphorylation. The G0 phase  
251 data was used for additional training of the model to learn cell-type specific phosphorylation  
252 patterns, and the G1, G2 and S phase were used for testing the CAROM model. CAROM  
253 achieved high MCC, AUC and precision in all conditions tested. 116 out of 142 predictions on  
254 phase-specific phosphorylated enzymes/reactions were also observed experimentally (S. Table  
255 12). Similar to *E. coli* and yeast, there was significant correlation between the maximum flux of a  
256 reaction in a condition and the change in phosphorylation of the corresponding enzyme during  
257 the mammalian cell cycle (S. Figure 11). For example, AMP deaminase (AMPD2) shows a  
258 threefold increase in phosphorylation in G2 phase wherein it also shows a corresponding  
259 increase in maximal flux. These results together suggest that knowledge of fluxes can be  
260 predictive of regulation by phosphorylation in mammalian systems as well.



261 CAROM also predicted several reactions to be targets of acetylation in various phases (S. Table  
262 13). The predicted list includes enzymes such as ATP-citrate lyase whose activity is known to  
263 be regulated by acetylation during the cell cycle [55,56]. As we lack proteome-wide time-course  
264 acetylation data to systematically confirm these predictions, we compared predictions with data  
265 from cells treated with deacetylase inhibitors [57]. Deacetylase inhibitors prevent the removal of  
266 acetylation marks. Hence new acetylation marks progressively accumulate over time resulting in  
267 cell death. We hypothesized that acetylation sites predicted by the CAROM model during the  
268 cell cycle will be enriched among the proteins with increased acetylation after deacetylase  
269 inhibitor treatment. Indeed, there was a significant overlap between CAROM predicted  
270 acetylated enzymes and those found to increase significantly ( $> 1.5$ -fold) after treatment with  
271 four different pan-deacetylase inhibitors – nicotinamide, tenovin-6, tubacin and PCI24781.  
272 Interestingly, even though the experimental proteomics data was not phase specific, we  
273 observed the highest overlap for nicotinamide targets with CAROM predictions in the G2 phase  
274 of the cell cycle (hyper-geometric p-value =  $3 \times 10^{-16}$ ), which also had the highest number of  
275 acetylated reactions (Figure 3E; S. Table 14). This overlap suggests that growth inhibition likely  
276 occurs in the G2 phase, which is consistent with experimental data from nicotinamide treatment  
277 in various mammalian cell types that have observed growth arrest at G2 [58–60].

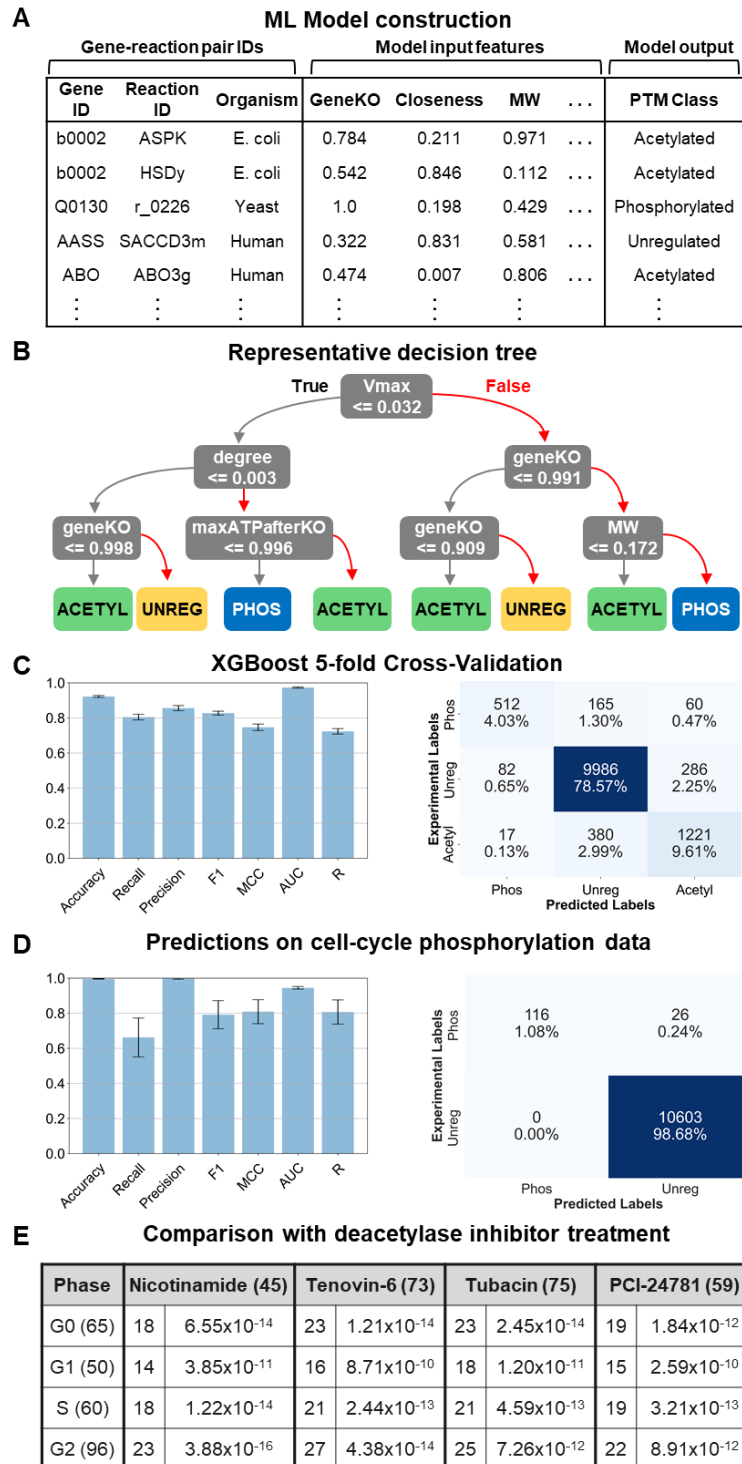

278

279 **Figure 3: Construction and validation of the CAROM model** **A.** Table of inputs for CAROM. The input features  
 280 comprise 13 gene, reaction, and enzyme properties. The target column includes the post-translational modification  
 281 class. Each gene-reaction pair is marked as either phosphorylated, acetylated, or unregulated by PTMs. **B.** A single  
 282 decision tree model was built by training on the observations from all organisms, while only using the top 50% most  
 283 important features as identified in the SHAP analysis. The complexity of the tree was constrained by limiting the  
 284 tree depth to enable ease of interpretation and visualization. The XGBoost model is made of an ensemble of such

285 decision trees. **C.** The results from the CAROM model from 5-fold cross validation are shown in the bar graph (left)  
286 with the standard deviations represented by the error bars. The cross-validation results are also shown in the  
287 confusion matrix. **D.** Comparison of model predictions for the G1, S and G2 phases of the cell cycle with  
288 experimental phospho-proteomics data for those phases. Confusion matrix shows predictions from main CAROM  
289 model, while the bar graph shows the standard deviation for five models trained with different random seeds. **E.**  
290 Comparison of cell cycle acetylation predictions with experimental acetylomics data from HeLa cells treated with  
291 pan-deacetylase inhibitors. The number of unique acetylated genes for each group are displayed in parentheses.  
292 Within the table, the number of overlapping genes between each phase and drug is shown, along with the p-value of  
293 the hypergeometric test.

294

## 295 **Interpreting the machine-learning model using Shapley analysis**

296 To understand how CAROM predicted regulation by each PTM, we used a game-theoretic  
297 framework called Shapley analysis to quantify the contribution of each feature to the model  
298 accuracy using the SHAP (SHapley Additive exPlanation) Python package [61,62]. The Shapley  
299 'feature importance' values are computed by sequentially adding one feature at a time and  
300 measuring the feature's contribution to the model output. To account for the order in which the  
301 features are added to the decision trees, this process is repeated for all possible orderings. The  
302 Shapley value represents the average impact for each feature across all orders (Methods).

303 All 13 features contributed to the CAROM predictions, albeit to various extents. Molecular  
304 weight and maximum flux had two of the highest importance scores, and higher values favored  
305 phosphorylation, which is consistent with the high enrichment we observed using our statistical  
306 analysis (Figure 4A). Growth-related features, such as impact of gene knockout on biomass and  
307 ATP, were found to have opposite Shapley values for acetylation and phosphorylation  
308 respectively (Figure 4A). Thus, high growth values after knockout favor phosphorylation while  
309 low growth values favor acetylation. Similar to *E. coli* and yeast, the set of proteins acetylated in  
310 HeLa cells were highly enriched for essential genes identified by both FBA simulations and  
311 experimental genome-wide CRISPR knockdown studies (hypergeometric test comparing  
312 acetylated metabolic genes to all metabolic genes, p-value =  $1 \times 10^{-3}$  &  $9 \times 10^{-7}$  for FBA and  
313 CRISPR respectively). These results show that changes in fluxes and essentiality between  
314 conditions are associated with a corresponding change in regulation by PTMs.

315 Molecular weight, topological features and reversibility were used by CAROM to differentiate all  
316 regulated genes from those that are un-regulated (Figure 4A, 3B, S. Figure 12). Gene knockout  
317 growth and maximum flux likely aid in differentiating between PTMs based on their opposing  
318 Shapley values for each PTM. These observations help explain why using both acetylation and  
319 phosphorylation in a single model improves performance compared to ML models built  
320 separately for each PTM (S. Figure 14). The SHAP decision plots and force plots shows how  
321 these features influence the prediction outcome for any given protein (Figure 4B). This also  
322 allowed us to identify factors that led to incorrect predictions by the ML model. Notably, a  
323 majority of the incorrect phosphorylation predictions were on proteins that had high molecular  
324 weight (S. Figure 13). Our ability to more accurately predict context specific fluxes and gene  
325 essentiality in the future may help rectify these incorrect predictions.

326 To tease out organism specific differences, we next built CAROM models separately for each  
327 organism. Overall, the model accuracy and feature importance were similar for both the pan-  
328 organism CAROM model and organism-specific models (S. Figures 15, 16, 17, 18). This  
329 suggests that a similar template involving the same set of features is used for partitioning

330 regulation.  $V_{max}$ , molecular weight, topology and gene knockout values are used in the same  
331 way in all three organisms for partitioning regulation. However, the specific parameters (the  
332 threshold for  $V_{max}$  or molecular weight) were organism specific. Nevertheless, these  
333 parameters can be learned by CAROM using a small subset of data. Hence while the accuracy  
334 is very low when an entire organism's data is removed from the model and used as a test set, a  
335 substantial increase is observed when just 10% of the test organism's data is used for additional  
336 training (S. Figure 18).

337 The distribution of these top features from CAROM may explain the differences in distribution of  
338 PTMs observed between different species and metabolic conditions. We observed that the  
339 number of reactions with high  $V_{max}$  was an order of magnitude higher in yeast compared to *E.*  
340 *coli* for the same condition (stationary phase). A concordant difference in number of reactions  
341 regulated by phosphorylation was observed between the two species (S. Figure 19). A similar  
342 trend was observed in phosphorylation levels in different conditions within the same species,  
343 namely the phases of the mammalian cell cycle and nutrient adaptation in *E. coli* (S. Figures  
344 10,11). In addition, the total reactions regulated by acetylation correlated with the number of  
345 growth-limiting enzymes across conditions or species (S. Figure 8, 9, 19).

346

347

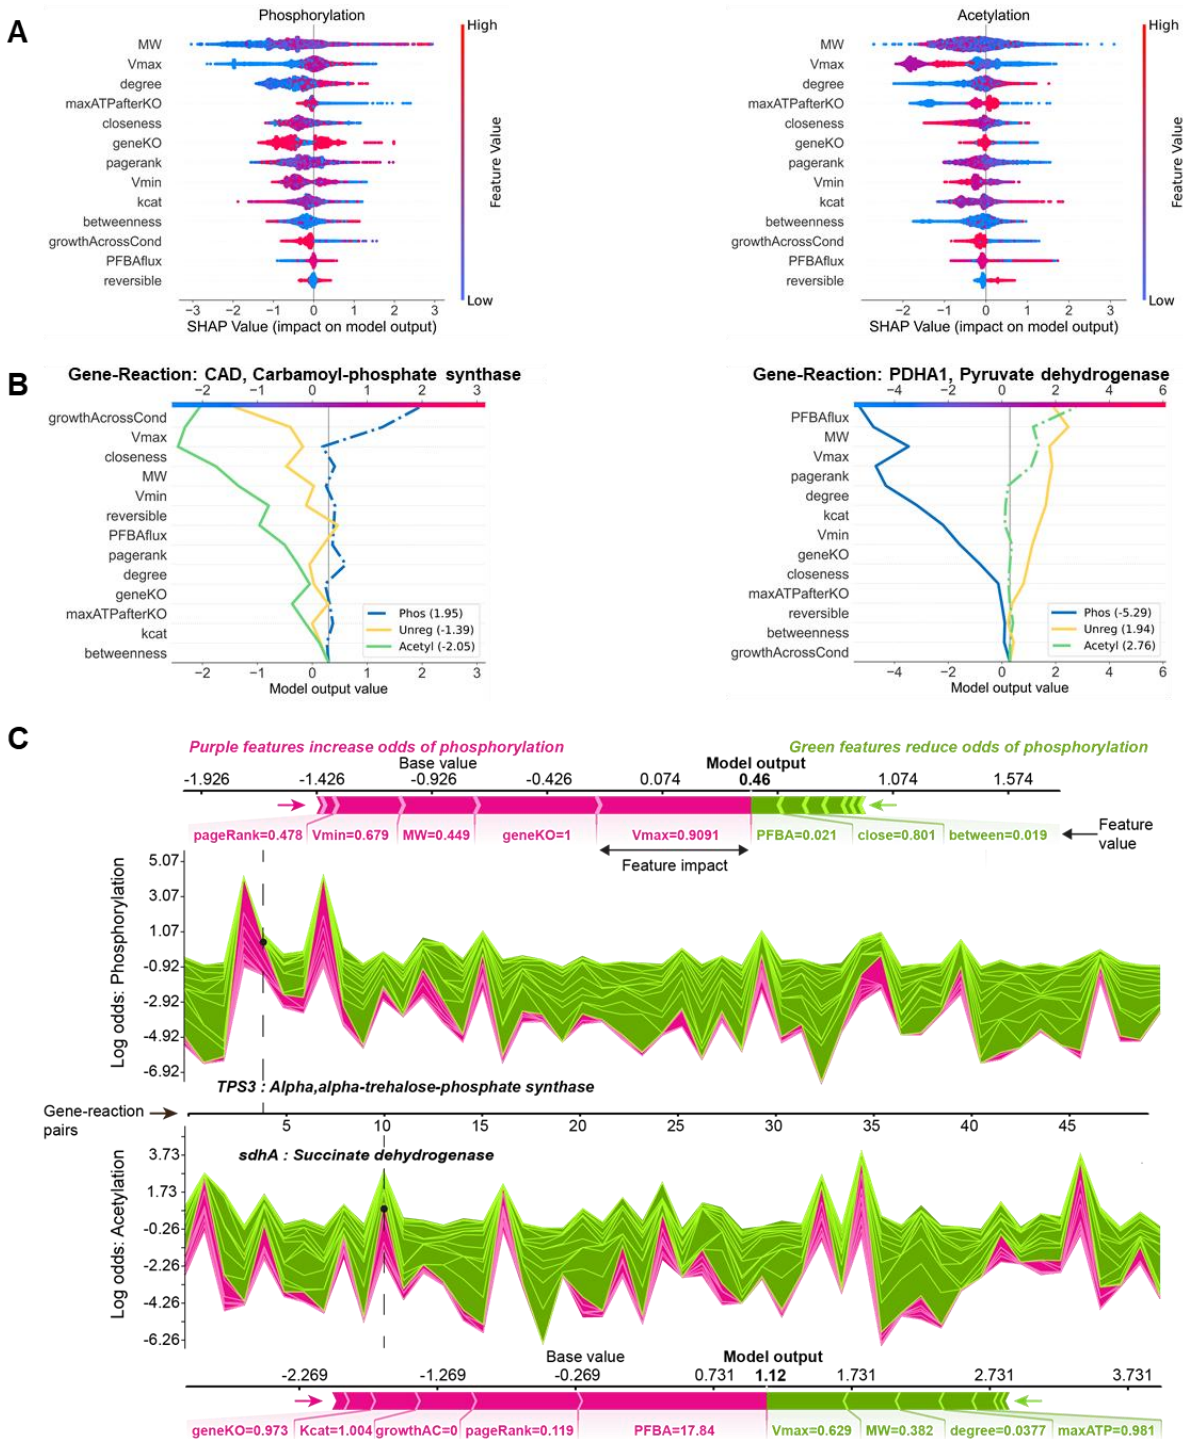

348

349 **Figure 4: Interpretation of the CAROM model using Shapley analysis.** A. SHAP summary plot for the  
 350 phosphorylation class (left) and acetylation class (right). The summary plot shows how a feature's effect on the  
 351 output changes with its own value. For each feature, high values are shown in red and low values in blue. For  
 352 example, it appears that Vmax is positively and negatively correlated with the log odds of phosphorylation and  
 353 acetylation, respectively. Features are ordered on the y-axis by their average SHAP importance value across the  
 354 three classes. B. SHAP decision plots for a phosphorylated enzyme (left) and acetylated enzyme (right) show how  
 355 the model's prediction was made for a single observation. Each line represents the log odds for a single class. The

356 features are on the y-axis and are sorted by the average SHAP value for that specific observation. The lines intercept  
357 the top x-axis at their final log odds value. The class with the maximum log odds value is used as the model's  
358 output. C. SHAP force plots show the features which significantly pushed the model output from its expected value  
359 to its final prediction. Features that push the prediction higher for the respective class are shown in purple and  
360 features that pushed it lower are shown in green. Single force plots for a phosphorylated reaction (top; TPS3) and an  
361 acetylated reaction (bottom; sdhA) are shown. The collective force plots are made up of many single force plots  
362 rotated 90 degrees and stacked together horizontally and are shown for phosphorylation (upper middle) and  
363 acetylation (bottom middle) for the same 50 random observations. The model output,  $f(x)$ , is on the y-axis and  
364 observations on the x-axis. The dashed lines show where the single force plot observations appear in the collective  
365 force plot. For both the single and collective force plots, the model output is read where the purple and green areas  
366 intersect.

367

## 368 Discussion

369 There are several ways to regulate an enzyme's activity in a cell. Yet, the principles that  
370 determine when an enzyme is regulated by different PTMs are unknown. Here we  
371 systematically analyze patterns of metabolic regulation in model microbes and mammalian cells  
372 using a new approach called CAROM. Our approach explains why some proteins are regulated  
373 by specific PTMs in a given condition based on their biochemical properties, activity in a  
374 condition, and location in the metabolic network. We find that a small set of 13 features can  
375 distinguish the targets of each mechanism. The importance of these features is highly  
376 consistent across numerous datasets suggesting that these features may play a role in  
377 influencing regulation. Although the relevance of some of the features, such as topology, has  
378 been observed previously for transcriptional regulation, this is the first time that an association  
379 between regulation by PTMs and condition-specific attributes such as maximal flux has been  
380 reported.

381 These key features identified by CAROM may be related to specific functions performed by  
382 each PTM. For example, phosphorylation may represent a mechanism of feedback regulation to  
383 control futile cycles and high flux reactions that consume ATP [6,63]. The differences in the total  
384 number of isozymes and high flux enzymes between species may explain the varying number of  
385 phosphorylation targets observed between the species. Since isozymes arise frequently from  
386 gene duplication, our results may also explain the observation that duplicated genes are more  
387 likely to be regulated by phosphorylation [64]. However, it is unclear how the maximum flux is  
388 sensed by cells. These regulatory interactions may have been shaped by evolution to avoid  
389 drain of ATP. Cells may also utilize 'flux sensors' to identify such reactions [65]. Similarly, we  
390 find that enzymes are likely to be acetylated in conditions where their activity is growth limiting.  
391 The number of acetylated enzymes correlates with the number of essential genes between  
392 organisms or between conditions. During transition to stationary phase, essential genes do not  
393 show significant changes in transcript and protein levels, but show significant changes in  
394 acetylation in both yeast and *E. coli*. By regulating growth limiting enzymes, acetylation may  
395 play an evolutionarily conserved role in determining the balance of biosynthetic and catabolic  
396 processes in a cell.

397 Our approach does have limitations primarily due to the underlying algorithms and datasets  
398 used. The accuracy of the metabolic reconstruction strongly influences CAROM accuracy. False  
399 positive gene knockout essentiality predictions can lead to incorrect assignment of regulation by  
400 acetylation. Using experimental gene deletion screens can improve accuracy but may not be  
401 available for all conditions. Similarly, phosphorylation predictions can be impacted by flux

402 predictions by FBA. FBA is currently the most powerful approach to obtain genome-wide fluxes.  
403 Nevertheless, the incorporation of context-specific omics datasets can improve accuracy of the  
404 predicted fluxes from FBA and subsequently predicted regulation by CAROM. Further, the set of  
405 features used in CAROM, although most of them were significantly associated with regulation,  
406 are unlikely to be exhaustive. These features were selected based on prior knowledge and ease  
407 of prediction using FBA. Other features such as presence of other PTMs may provide additional  
408 information to improve accuracy. Finally, ML methods require numerous measurements for  
409 training and may not perform well in cases with small sample sizes.

410 In sum, our analysis reveals a unique distribution of regulation by PTMs within the metabolic  
411 network. This can help identify PTMs that will likely orchestrate flux adjustments based on  
412 reaction attributes. By identifying context-specific factors that are associated with regulation by  
413 PTMs, CAROM can complement sequence-based approaches for identifying PTM sites. It is  
414 well established that individual regulators such as transcription factors or kinases have their own  
415 unique set of targets. Here we find that similar specialization likely occurs at a higher scale,  
416 between PTMs. Our approach can guide drug discovery and metabolic engineering efforts by  
417 identifying regulators that are dominant in different parts of the network [66]. CAROM can also  
418 be used to uncover the impact of metabolic alterations on PTMs in normal and pathological  
419 processes. Given the conservation of these principles in *E. coli*, yeast, and mammalian cells, it  
420 provides a path towards a detailed understanding of post-translational regulation in a wide  
421 range of organisms and to uncover target specificities of other PTMs. This approach may help  
422 define the basic regulatory architecture of metabolic networks.

423

## 424 **Methods**

### 425 **Compilation of omics data**

426 We used RNA-sequencing data from Treu *et al* 2014 that compared the expression profile of *S.*  
427 *cerevisiae* between mid-exponential growth phase with early stationary phase [30]. A 2-fold  
428 change threshold was used to identify differentially expressed genes. Lysine acetylation and  
429 protein phosphorylation data were obtained from the Weinert *et al* 2014 study that compared  
430 PTM levels between exponentially growing and stationary phase cells using *stable isotope*  
431 *labeling with amino acids in cell culture* (SILAC) [29]. A 2-fold change threshold of the protein-  
432 normalized PTM data was used to identify differentially expressed PTMs. Proteomics data was  
433 taken from Murphy *et al* time-course proteomics study [28]. The hoteling T2 statistic defined by  
434 the authors was used to identify proteins differentially expressed during diauxic shift; the top  
435 25% of the differentially expressed proteins were assumed to be regulated. Proteomics data  
436 from Weinert *et al* was also used as an additional control and we observed the same trends  
437 using this data as well (S. Table 7). Further, we repeated the analysis after removing genes that  
438 were not expressed during transition to stationary phase; the transcripts for a total of 12 genes  
439 out of the 910 in the model were not detected by RNA-sequencing in the Treu *et al* study [30].  
440 Removing the 12 genes did not impact any of the results (S. Table 6).

441 As additional validation, we used periodic data from the yeast cell cycle. Time-course SILAC  
442 phospho-proteomics data was obtained from Touati *et al* [39]. Phospho-sites whose abundance  
443 declined to less than 50% or increased by more than 50% at least two consecutive timepoints  
444 were considered dephosphorylated or phosphorylated respectively as defined by the authors.  
445 Transcriptomics data was taken from Kelliher *et al* study that identified 1246 periodic transcripts

446 using periodicity-ranking algorithms [40]. The phospho-proteomics and transcriptome data  
447 during nitrogen shift was obtained from Oliveira *et al* [37,38]. The nitrogen shift studies  
448 compared the impact of adding glutamine to yeast cells growing on a poor nitrogen source  
449 (proline alone or glutamine depletion) with cells growing on a rich nitrogen source (glutamine  
450 plus proline). A 2-fold change threshold was used to identify differentially expressed transcripts  
451 and phospho-sites.

452 *E. coli* acetylation data was taken from the Weinert *et al* study comparing actively growing  
453 exponential phase cells to stationary phase cells [43]. Proteomics and transcriptomics were  
454 from Houser *et al* study of *E. coli* cells in early exponential phase and stationary phase [42].  
455 Phospho-proteomics data for exponential and early stationary phase *E. coli* cells was taken  
456 from Soares *et al* [41]. We used a 2-fold change ( $p < 0.05$ ) threshold for all studies.

457 Condition specific PTM data for *E. coli* was taken from Schmidt *et al* 2016 study [44]. Among the  
458 22 different experimental conditions measured, those conditions that involved change in carbon  
459 sources that could be modeled using FBA were chosen. The following carbon sources were  
460 used: acetate, fumarate, galactose, glucose, glucosamine, glycerol, pyruvate, succinate,  
461 fructose, mannose and xylose. Out of 44 unique lysine acetylation and 21 serine/ threonine  
462 phosphorylation sites identified in the study ( $FDR < 0.01$ ), 11 and 5 proteins were mapped to  
463 the metabolic model for the subset of conditions analyzed here. Protein modifications were  
464 normalized by their corresponding protein levels.

465 Acetylated proteins in HeLa cells were taken from Kori *et al* 2017 which measured time course  
466 acetylation levels in HeLa cells grown on  $^{13}C$  labeled glucose with samples collected at 0.5, 1,  
467 4, 8, 12, 16, and 24 hours [49]. A total of 702 unique target proteins were identified based on  
468 significance of acetylation incorporation as monotonic trend across the time points using the  
469 Mann-Kendall statistical test ( $p$ -value  $< 0.05$ ) as defined by the authors. For the phosphorylation  
470 data for HeLa cells, phosphorylation sites that are up-regulated during mitosis and show more  
471 than 50% occupancy as defined by the authors were used [50].

472 Phosphoproteomics data from the mammalian cell cycle contained a total of 5861 identified  
473 phosphopeptides. Phospho-peptides whose abundance intensities (or signal to noise ratios) are  
474 zero at any channel (or any time point sample), those with Ascore  $< 13$ , and those that were  
475 identified by a decoy dataset in a reverse manner were removed, resulting in a set of 3095  
476 phosphopeptides that correspond to 1552 unique proteins. A z-score normalization was  
477 performed to identify phase specific differential levels of phosphorylated proteins (z threshold of  
478  $\pm 2$ )

479 Gene essentiality based on CRISPR knockout screens was obtained from Hart *et al* 2015 study  
480 that measured essentiality across all 5 cell lines (HeLa, RPE1 DLD1, GBM and HCT116) [67].  
481 Growth limiting genes with  $FDR < 0.05$  were considered to be essential, as defined by the  
482 authors. In addition, essential genes from Hart *et al* 2017 study using genome-wide knockout  
483 screens in 17 human cell lines also showed similar enrichment among acetylated proteins ( $p$ -  
484 value =  $1.7 \times 10^{-7}$ ) [68].

485 The results are robust to the thresholds used for identifying differentially expressed genes or  
486 proteins (S. Tables 6, 7, 8). In all studies, genes and proteins that are either up or down



487 regulated were considered to be regulated. The final data set table used for all comparative  
488 analyses is provided as a supplementary material (S. Tables 14, 15, 16).

489

## 490 **Genome scale metabolic modeling**

491 We used the yeast metabolic network reconstruction (Yeast 7) by Aung *et al*, which contains  
492 3,498 reactions, 910 genes and 2,220 metabolites [32]. The analysis of *E. coli* data was done  
493 using the IJO1366 metabolic model [69] and the mammalian cell cycle modeling was done  
494 using the human metabolic reconstruction (Recon1) [70]. All analyses were performed using the  
495 COBRA toolbox for MATLAB [71].

496 The impact of gene knockouts on growth was determined using flux balance analysis (FBA).  
497 FBA identifies an optimal flux through the metabolic network that maximizes an objective,  
498 usually the production of biomass. A minimal glucose media (default condition) was used to  
499 determine the impact of gene knockouts. Further, gene knockout analysis was repeated in  
500 different minimal nutrient conditions to identify genes that impact growth across diverse  
501 conditions; these conditions span all carbon and nitrogen sources that can support growth in the  
502 metabolic models. The number of times each gene was found to be lethal (growth < 0.01 units)  
503 across all conditions was used as a metric of essentiality.

504 To infer topological properties, a reaction adjacency matrix was created by connecting reactions  
505 that share metabolites. We used the Centrality toolbox function in MATLAB to infer all network  
506 topological attributes including centrality, degree and PageRank. Removing highly connected  
507 metabolites did not affect the associations between topology and regulation (S. Figure 20).

508 Flux Variability Analysis (FVA) was used to infer the range of fluxes possible through every  
509 reaction in the network. Two sets of flux ranges were obtained with FVA – the first with optimal  
510 biomass and the latter without assuming optimality. In the second case, the fluxes are limited by  
511 the availability of nutrients and energetics alone, thus it reflects the full range of metabolic  
512 activity possible in a cell. Reactions with maximal flux above 900 units were assumed to be  
513 unconstrained and were excluded from the analysis, as they are likely due to thermodynamically  
514 infeasible internal cycles [72]; the choice of this threshold for flagging unconstrained reactions  
515 did not impact the distribution between regulators over a wide range of values (S. Table 9).

516 For fitting experimentally derived flux data from Hackett *et al* [21], reactions were fit to the fluxes  
517 using linear optimization and the flux through remaining reactions that do not have  
518 experimentally derived flux data were inferred using FVA. Analysis using a related approach for  
519 inferring fluxes – PFBA, did not reveal any significant difference as PFBA eliminates futile cycles  
520 and redundancy by minimizing total flux through the network while maximizing for biomass [73]  
521 (S. Figure 5).

522 Reaction reversibility was determined directly from the model annotations. We also used  
523 additional reversibility annotation from Martinez *et al* based on thermodynamics analysis of the  
524 Yeast metabolic model [74]. Pathway annotations and enzyme molecular weight values were  
525 obtained from Sanchez *et al*. The catalytic activity values were obtained from Sanchez *et al*,  
526 Heckman *et al*, and Yeo *et al* for Yeast, *E. coli* and mammalian cells respectively [75–77]. The  
527 comparative analysis of regulatory mechanisms was also repeated using the updated Yeast 7.6  
528 model and yielded similar results (S. Table 5) [75].

529 Models for each cell cycle phase were built using the Dynamic Flux Activity (DFA) approach  
530 [53,78]. The cell cycle metabolomics data contains 155 intracellular metabolites and 173  
531 extracellular metabolites and was used as inputs for DFA. The time points were grouped in to  
532 different phases as follows: 0 – 4 hours for G0-G1, 4 – 8 – 12 hours for G1, 12 – 16 hours for  
533 G1-S, and 16 – 20 hours for G2-M. DFA utilizes time-course metabolomics data and calculates  
534 the rate of change of each metabolite level over time ( $dM/dt$ ). The rate of change of each  
535 metabolite is calculated using linear regression in DFA. Based on the regression line for a  
536 metabolite  $i$ , one calculates  $\epsilon_i$  which is the slope divided by the intercept which is a  
537 normalization factor at the initial time point. Then, together with a known metabolic network for  
538 the stoichiometry matrix,  $\mathbf{S}$ , and by introducing flux activity coefficients,  $\alpha$  and  $\beta$ , the DFA  
539 equation becomes a modified version of the conventional FBA:  $\mathbf{S} \cdot \mathbf{v} + \alpha - \beta = \epsilon$ .  $\alpha$  and  $\beta$  are both  
540 positive values. This equation is then solved by minimizing  $\alpha + \beta$  and maximizing the biomass  
541 objective function, yielding a flux vector or distribution of all reactions for time-course data. For  
542 validating the CAROM model, the fluxes from the G0 phase were used in the training set and  
543 the remaining phases were used for testing. This analysis was repeated by training on different  
544 phases of the cell cycle. The accuracy from the G1, S and G2 phases was lower compared to  
545 training on G0. suggesting that these conditions have a distinct phosphorylation pattern from the  
546 G0 condition (S. Figure 21).

547 The comparative analysis of target properties was done using gene-reaction pairs rather than  
548 genes or reactions alone. The gene-reaction pairs accounts for regulation involving all possible  
549 combinations of genes and associated reaction. This includes isozymes that may involve  
550 different genes but the same reaction, or multi-functional enzymes involving same the gene  
551 associated with different reactions. For example, the 910 genes and 2310 gene-associated  
552 reactions resulted in 3375 unique gene-reaction pairs in yeast.

### 553 **Statistical analysis**

554 All statistical tests were performed using MATLAB. Significance of overlap between lists was  
555 estimated using the hypergeometric test. Significance of the differences in target properties  
556 between regulatory mechanisms were determined using ANOVA, the non-parametric Kruskal-  
557 Wallis test, and after multiple hypothesis correction (S. Table 5).

### **Machine learning**

558 The CAROM-ML model was built using the XGBoost package in Python. XGBoost is a gradient  
559 boosting algorithm that uses decision trees as its weak learners [48]. Unlike bagging algorithms,  
560 such as random forest, which train their learners independently in parallel, boosting algorithms  
561 train their predictors sequentially. Each weak learner uses gradient descent to minimize the  
562 error of the previous learner. XGBoost is unique among boosted algorithms due to its speed and  
563 regularization abilities, which help prevent over-fitting.

564 We used a randomized search with an internal cross validation in the training set to tune  
565 hyperparameters. A stratified split was employed to ensure the class balance was preserved  
566 between the training and test sets. To measure the model robustness and generalization, we  
567 performed 5-fold cross-validation. The hyperparameters were re-tuned on each iteration. The  
568 hyperparameters from the fold with the best performance were then used to fit a final model to  
569 the entire training set. To assess predictive power in novel conditions, the model was also  
570 assessed using data from G1, G2 & S phase conditions. Note that for the acetylation predictions

571 during the cell cycle, no additional training data was available for the G0 phase (in contrast to  
572 phosphorylation)

573 To assess the impact of using other ML algorithms on CAROM accuracy, additional models  
574 were built using Random Forests and AdaBoost. Similar accuracy to XGBoost was obtained  
575 using these approaches (S. Figure 22) [79]. AdaBoost is also a gradient boosting algorithm that  
576 can use decision trees as its base learners. For each learner, weights are assigned to its errors  
577 and these weights are used to adjust the next learner's predictions.

578 For model interpretation, a single decision tree model was created to visualize the typical  
579 prediction path that an observation follows when its class is being decided. The decision tree  
580 was built using the scikit-learn Python package. The decision tree was trained on the entire  
581 dataset and the RandomizedSearchCV function was used to tune hyperparameters, including  
582 maximum depth. To address the class imbalance, synthetic minority oversampling (SMOTE)  
583 was used for training the decision tree model.

584 To build the ML model, each gene-reaction pair is assigned a class of -1, 0, or 1, corresponding  
585 to phosphorylated, unregulated and acetylated, respectively. For cases where genes/proteins  
586 were regulated by both PTM types in the training data, phosphorylation was assigned, as this  
587 was the minority class. This overlap occurred in 25 gene-reaction pairs in the *E. coli* dataset, 67  
588 pairs for yeast and 2 for HeLa. Any genes that were included in the metabolic network, but not  
589 found in the corresponding PTM dataset, were assumed to be non-regulated. Any missing  
590 feature data was replaced with the median value. To account for the differences between  
591 organism characteristics, we normalized the features for each condition table on a scale of 0 to  
592 1 for each condition. The catalytic activity and PFBA flux features showed unique organism-  
593 specific signatures when normalized, so these two attributes were scaled using their mean  
594 values. Reaction reversibility is a binary variable and therefore was not scaled. Prior to scaling,  
595 the maximum and minimum reaction flux features were limited to 100 to reduce feature range,  
596 as opposed to the value of 900 used in the statistical portion of the study. This step did not  
597 significantly affect the model accuracy (S. Figure 23)

598 Proteins that were not annotated to be acetylated or phosphorylated in any condition in the  
599 protein lysine modification database or the UniProt database were removed from the ML model  
600 [80,81]. However, this step did not significantly alter the accuracy as most metabolic proteins  
601 were annotated to be regulated by these PTMs (S. Figure 24). The final data used to train the  
602 CAROM-ML model included 2427 gene-reaction pairs for *E. coli*, 3039 for yeast, 3661 for HeLa,  
603 and 3582 for the G0 condition of the mammalian cell cycle dataset, for a total of 12,709  
604 observations (S. Figure 25, S. Tables 15-17). The validation set, which includes the G1, S, and  
605 G2 phases, contained 10746 pairs (3582 for each phase).

## 606 **Shapley analysis**

607 For determining features that have the largest influence in the ML models, we used the SHAP  
608 (SHapley Additive exPlanation) package in Python. SHAP uses the game theory concept of  
609 Shapley values for calculating each feature's contribution to the model output [62]. The Shapley  
610 analysis was completed using TreeExplainer from the SHAP package. TreeExplainer is  
611 specifically designed for use with tree-based models. The Shapley value represents the average  
612 impact for each feature across for all possible orderings. This process is represented by the  
613 following equation:

$$\phi_i(f, x) = \sum_{S \subseteq S_{\text{all}} \setminus \{i\}} \frac{|S|! (M - |S| - 1)!}{M!} [f_x(S \cup \{i\}) - f_x(S)]$$

614

615 The Shapley value is the  $\phi_i(f, x)$  term, or the effect that feature  $i$  has on model  $f$ , given the  
616 independent variable data,  $x$ .  $M$  is the total number of features, and  $M!$  represents the number of  
617 possible feature combinations.  $S$  is a subset of the features excluding feature  $i$ ,  $|S|$  is the  
618 number of features in subset  $S$ , and  $f_x(S)$  is the model output for subset  $S$ . The SHAP values  
619 are relative to the average model output, called the base value. The base value can also be  
620 thought of as the null model output. Therefore, the sum of the SHAP values for a given  
621 observation is equal to the difference between the model prediction and the base value.  
622 Considering the SHAP values across all observations in a dataset provides insight into the  
623 overall feature importance, direction of a feature's impact on the model output and relationships  
624 between the predictor features. For model interpretation using SHAP, the final XGBoost model  
625 and its training data were used as inputs to the TreeExplainer function.

626

627

628 **Acknowledgments: Funding:** This work was supported by faculty start-up funds from the  
629 University of Michigan and R35 GM13779501 from NIH to SC. **Author contributions:** S.C  
630 conceived the study, S.C, K.S, H.L and F.S designed and performed research, and S.C wrote  
631 the manuscript with inputs from K.S and H.L. **Competing interests:** Authors declare no  
632 competing interests. **Data and materials availability:** All datasets are available in the  
633 supplementary materials.

634

635

636

637

## References

638

639

- 640 1. Nielsen J. Systems Biology of Metabolism. Annu Rev Biochem. 2017. doi:10.1146/annurev-  
641 biochem-061516-044757
- 642 2. Cho BK, Zengler K, Qiu Y, Park YS, Knight EM, Barrett CL, et al. The transcription unit  
643 architecture of the Escherichia coli genome. Nat Biotechnol. 2009. doi:10.1038/nbt.1582
- 644 3. Chubukov V, Gerosa L, Kochanowski K, Sauer U. Coordination of microbial metabolism.  
645 2014.
- 646 4. Heinemann M, Sauer U. Systems biology of microbial metabolism. Curr Opin Microbiol.  
647 2010;13: 337–343. doi:10.1016/j.mib.2010.02.005

- 648 5. Aebersold R, Agar JN, Amster IJ, Baker MS, Bertozzi CR, Boja ES, et al. How many human  
649 proteoforms are there? 2018.
- 650 6. Kochanowski K, Sauer U, Noor E. Posttranslational regulation of microbial metabolism.  
651 *Curr Opin Microbiol.* 2015;27: 10–17.
- 652 7. Ihmels J, Levy R, Barkai N. Principles of transcriptional control in the metabolic network of  
653 *Saccharomyces cerevisiae*. *Nat Biotechnol.* 2004. doi:10.1038/nbt918
- 654 8. Stadtman ER. Mechanisms of Enzyme Regulation in Metabolism. *Enzymes.* 1970.  
655 doi:10.1016/S1874-6047(08)60171-7
- 656 9. Holzer H, Duntze W. Metabolic Regulation by Chemical Modification of Enzymes. *Annu*  
657 *Rev Biochem.* 1971. doi:10.1146/annurev.bi.40.070171.002021
- 658 10. Fell D, Cornish-Bowden A. Understanding the control of metabolism. Portland press  
659 London; 1997.
- 660 11. Stadtman ER, Chock PB. Interconvertible Enzyme Cascades in Metabolic Regulation.  
661 *Current Topics in Cellular Regulation.* 1978. doi:10.1016/B978-0-12-152813-3.50007-0
- 662 12. Zhao S, Xu W, Jiang W, Yu W, Lin Y, Zhang T, et al. Regulation of cellular metabolism by  
663 protein lysine acetylation. *Science.* 2010;327: 1000–1004.
- 664 13. Oliveira AP, Ludwig C, Picotti P, Kogadeeva M, Aebersold R, Sauer U. Regulation of yeast  
665 central metabolism by enzyme phosphorylation. *Mol Syst Biol.* 2012.  
666 doi:10.1038/msb.2012.55
- 667 14. Daran-Lapujade P, Rossell S, van Gulik WM, Luttik MAH, de Groot MJL, Slijper M, et al.  
668 The fluxes through glycolytic enzymes in *Saccharomyces cerevisiae* are predominantly  
669 regulated at posttranscriptional levels. *Proceedings of the National Academy of Sciences.*  
670 2007. doi:10.1073/pnas.0707476104
- 671 15. Zaslaver A, Mayo AE, Rosenberg R, Bashkin P, Sberro H, Tsalyuk M, et al. Just-in-time  
672 transcription program in metabolic pathways. *Nat Genet.* 2004. doi:10.1038/ng1348
- 673 16. Lee JM, Gianchandani EP, Eddy JA, Papin JA. Dynamic analysis of integrated signaling,  
674 metabolic, and regulatory networks. *PLoS Comput Biol.* 2008;4: e1000086.  
675 doi:10.1371/journal.pcbi.1000086
- 676 17. Covert MW, Knight EM, Reed JL, Herrgard MJ, Palsson BO. Integrating high-throughput  
677 and computational data elucidates bacterial networks. *Nature.* 2004;429: 92–96.  
678 doi:10.1038/nature02456nature02456 [pii]
- 679 18. Shen F, Boccuto L, Pauly R, Srikanth S, Chandrasekaran S. Genome-scale network model  
680 of metabolism and histone acetylation reveals metabolic dependencies of histone  
681 deacetylase inhibitors. *Genome Biol.* 2019;20. doi:10.1186/s13059-019-1661-z
- 682 19. Chandrasekaran S, Price ND. Probabilistic integrative modeling of genome-scale metabolic  
683 and regulatory networks in *Escherichia coli* and *Mycobacterium tuberculosis*. *Proceedings*  
684 *of the National Academy of Sciences.* 2010;107: 17845–17850.

- 685 20. Brunk E, Chang RL, Xia J, Hefzi H, Yurkovich JT, Kim D, et al. Characterizing  
686 posttranslational modifications in prokaryotic metabolism using a multiscale workflow. *Proc*  
687 *Natl Acad Sci U S A*. 2018. doi:10.1073/pnas.1811971115
- 688 21. Hackett SR, Zanotelli VRT, Xu W, Goya J, Park JO, Perlman DH, et al. Systems-level  
689 analysis of mechanisms regulating yeast metabolic flux. *Science*. 2016.  
690 doi:10.1126/science.aaf2786
- 691 22. Almaas E, Kovács B, Vicsek T, Oltvai ZN, Barabási AL. Global organization of metabolic  
692 fluxes in the bacterium *Escherichia coli*. *Nature*. 2004. doi:10.1038/nature02289
- 693 23. Stelling J, Klamt S, Bettenbrock K, Schuster S, Gilles ED. Metabolic network structure  
694 determines key aspects of functionality and regulation. *Nature*. 2002.  
695 doi:10.1038/nature01166
- 696 24. Stelling J, Sauer U, Szallasi Z, Doyle FJ 3rd, Doyle J. Robustness of cellular functions. *Cell*.  
697 2004;118: 675–685. doi:10.1016/j.cell.2004.09.008
- 698 25. Sharma K, D'Souza RCJ, Tyanova S, Schaab C, Wiśniewski JR, Cox J, et al. Ultradeep  
699 Human Phosphoproteome Reveals a Distinct Regulatory Nature of Tyr and Ser/Thr-Based  
700 Signaling. *Cell Rep*. 2014. doi:10.1016/j.celrep.2014.07.036
- 701 26. Narita T, Weinert BT, Choudhary C. Functions and mechanisms of non-histone protein  
702 acetylation. 2019.
- 703 27. Orth JD, Thiele I, Palsson BØ. What is flux balance analysis? *Nat Biotechnol*. 2010;28:  
704 245–248. doi:10.1038/nbt.1614
- 705 28. Murphy JP, Stepanova E, Everley RA, Paulo JA, Gygi SP. Comprehensive Temporal  
706 Protein Dynamics during the Diauxic Shift in *Saccharomyces cerevisiae*. *Molecular &*  
707 *Cellular Proteomics*. 2015. doi:10.1074/mcp.m114.045849
- 708 29. Weinert BT, Iesmantavicius V, Moustafa T, Schölz C, Wagner SA, Magnes C, et al.  
709 Acetylation dynamics and stoichiometry in *Saccharomyces cerevisiae*. *Mol Syst Biol*. 2014.  
710 doi:10.1002/msb.134766
- 711 30. Treu L, Campanaro S, Nadai C, Toniolo C, Nardi T, Giacomini A, et al. Oxidative stress  
712 response and nitrogen utilization are strongly variable in *Saccharomyces cerevisiae* wine  
713 strains with different fermentation performances. *Appl Microbiol Biotechnol*. 2014.  
714 doi:10.1007/s00253-014-5679-6
- 715 31. Beltrao P, Bork P, Krogan NJ, Van Noort V. Evolution and functional cross-talk of protein  
716 post-translational modifications. 2013.
- 717 32. Aung HW, Henry SA, Walker LP. Revising the representation of fatty acid, glycerolipid, and  
718 glycerophospholipid metabolism in the consensus model of yeast metabolism. *Ind*  
719 *Biotechnol* . 2013;9: 215–228. doi:10.1089/ind.2013.0013
- 720 33. Oliveira AP, Sauer U. The importance of post-translational modifications in regulating  
721 *Saccharomyces cerevisiae* metabolism. 2012.

- 722 34. Beltrao P, Albanèse V, Kenner LR, Swaney DL, Burlingame A, Villén J, et al. Systematic  
723 functional prioritization of protein posttranslational modifications. *Cell*. 2012.  
724 doi:10.1016/j.cell.2012.05.036
- 725 35. Schuetz R, Zamboni N, Zampieri M, Heinemann M, Sauer U. Multidimensional optimality of  
726 microbial metabolism. *Science*. 2012. doi:10.1126/science.1216882
- 727 36. Mahadevan R, Schilling CH. The effects of alternate optimal solutions in constraint-based  
728 genome-scale metabolic models. *Metab Eng*. 2003;5: 264–276.  
729 doi:10.1016/j.ymben.2003.09.002
- 730 37. Oliveira AP, Dimopoulos S, Busetto AG, Christen S, Dechant R, Falter L, et al. Inferring  
731 causal metabolic signals that regulate the dynamic TORC1-dependent transcriptome. *Mol*  
732 *Syst Biol*. 2015. doi:10.15252/msb.20145475
- 733 38. Oliveira AP, Ludwig C, Zampieri M, Weisser H, Aebersold R, Sauer U. Dynamic  
734 phosphoproteomics reveals TORC1-dependent regulation of yeast nucleotide and amino  
735 acid biosynthesis. *Sci Signal*. 2015. doi:10.1126/scisignal.2005768
- 736 39. Touati SA, Kataria M, Jones AW, Snijders AP, Uhlmann F. Phosphoproteome dynamics  
737 during mitotic exit in budding yeast. *EMBO J*. 2018. doi:10.15252/embj.201798745
- 738 40. Kelliher CM, Leman AR, Sierra CS, Haase SB. Investigating Conservation of the Cell-  
739 Cycle-Regulated Transcriptional Program in the Fungal Pathogen, *Cryptococcus*  
740 *neoformans*. *PLoS Genet*. 2016. doi:10.1371/journal.pgen.1006453
- 741 41. Soares NC, Spät P, Krug K, MacEk B. Global dynamics of the *Escherichia coli* proteome  
742 and phosphoproteome during growth in minimal medium. *J Proteome Res*. 2013.  
743 doi:10.1021/pr3011843
- 744 42. Houser JR, Barnhart C, Boutz DR, Carroll SM, Dasgupta A, Michener JK, et al. Controlled  
745 Measurement and Comparative Analysis of Cellular Components in *E. coli* Reveals Broad  
746 Regulatory Changes in Response to Glucose Starvation. *PLoS Comput Biol*. 2015.  
747 doi:10.1371/journal.pcbi.1004400
- 748 43. Weinert BT, Iesmantavicius V, Wagner SA, Schölz C, Gummesson B, Beli P, et al. Acetyl-  
749 phosphate is a critical determinant of lysine acetylation in *E. coli*. *Mol Cell*. 2013;51: 265–  
750 272.
- 751 44. Schmidt A, Kochanowski K, Vedelaar S, Ahrné E, Volkmer B, Callipo L, et al. The  
752 quantitative and condition-dependent *Escherichia coli* proteome. *Nat Biotechnol*. 2016.  
753 doi:10.1038/nbt.3418
- 754 45. Zampieri G, Vijayakumar S, Yaneske E, Angione C. Machine and deep learning meet  
755 genome-scale metabolic modeling. *PLoS Comput Biol*. 2019;15: e1007084.  
756 doi:10.1371/journal.pcbi.1007084
- 757 46. Kim GB, Kim WJ, Kim HU, Lee SY. Machine learning applications in systems metabolic  
758 engineering. 2020.

- 759 47. Yang JH, Wright SN, Hamblin M, McCloskey D, Alcantar MA, Schrübbers L, et al. A White-  
760 Box Machine Learning Approach for Revealing Antibiotic Mechanisms of Action. *Cell*.  
761 2019;177: 1649–1661. doi:10.1016/j.cell.2019.04.016
- 762 48. Chen T, Guestrin C. XGBoost: A scalable tree boosting system. *Proceedings of the ACM*  
763 *SIGKDD International Conference on Knowledge Discovery and Data Mining*. 2016.  
764 doi:10.1145/2939672.2939785
- 765 49. Kori Y, Sidoli S, Yuan ZF, Lund PJ, Zhao X, Garcia BA. Proteome-wide acetylation  
766 dynamics in human cells. *Sci Rep*. 2017. doi:10.1038/s41598-017-09918-3
- 767 50. Olsen JV, Vermeulen M, Santamaria A, Kumar C, Miller ML, Jensen LJ, et al. Quantitative  
768 phosphoproteomics reveals widespread full phosphorylation site occupancy during mitosis.  
769 *Science Signaling*. 2010. doi:10.1126/scisignal.2000475
- 770 51. Fisher D, Krasinska L, Coudreuse D, Novák B. Phosphorylation network dynamics in the  
771 control of cell cycle transitions. 2012.
- 772 52. Lee HJ, Jedrychowski MP, Vinayagam A, Wu N, Shyh-Chang N, Hu Y, et al. Proteomic and  
773 Metabolomic Characterization of a Mammalian Cellular Transition from Quiescence to  
774 Proliferation. *Cell Rep*. 2017. doi:10.1016/j.celrep.2017.06.074
- 775 53. Chandrasekaran S, Zhang J, Sun Z, Zhang L, Ross CA, Huang Y-C, et al. Comprehensive  
776 Mapping of Pluripotent Stem Cell Metabolism Using Dynamic Genome-Scale Network  
777 Modeling. *Cell Rep*. 2017;21. doi:10.1016/j.celrep.2017.07.048
- 778 54. Campit S, Chandrasekaran S. Inferring metabolic flux from time-course metabolomics.  
779 2020. doi:10.1007/978-1-0716-0159-4\_13
- 780 55. Lin R, Tao R, Gao X, Li T, Zhou X, Guan KL, et al. Acetylation stabilizes ATP-citrate lyase  
781 to promote lipid biosynthesis and tumor growth. *Molecular Cell*. 2013.  
782 doi:10.1016/j.molcel.2013.07.002
- 783 56. Icard P, Wu Z, Fournel L, Coquerel A, Lincet H, Alifano M. ATP citrate lyase: A central  
784 metabolic enzyme in cancer. 2020.
- 785 57. Schölz C, Weinert BT, Wagner SA, Beli P, Miyake Y, Qi J, et al. Acetylation site specificities  
786 of lysine deacetylase inhibitors in human cells. *Nature Biotechnology*. 2015.  
787 doi:10.1038/nbt.3130
- 788 58. Kim JY, Lee H, Woo J, Yue W, Kim K, Choi S, et al. Reconstruction of pathway modification  
789 induced by nicotinamide using multi-omic network analyses in triple negative breast cancer.  
790 *Scientific Reports*. 2017. doi:10.1038/s41598-017-03322-7
- 791 59. Hassan RN, Luo H, Jiang W. Effects of nicotinamide on cervical cancer-derived fibroblasts:  
792 Evidence for therapeutic potential. *Cancer Management and Research*. 2020.  
793 doi:10.2147/CMAR.S229395
- 794 60. Saldeen J, Tillmar L, Karlsson E, Welsh N. Nicotinamide- and caspase-mediated inhibition  
795 of poly(ADP-ribose) polymerase are associated with p53-independent cell cycle (G2) arrest  
796 and apoptosis. *Molecular and Cellular Biochemistry*. 2003. doi:10.1023/A:1021651811345



- 797 61. Lundberg SM, Nair B, Vavilala MS, Horibe M, Eisses MJ, Adams T, et al. Explainable  
798 machine-learning predictions for the prevention of hypoxaemia during surgery. *Nature*  
799 *Biomedical Engineering*. 2018. doi:10.1038/s41551-018-0304-0
- 800 62. Lundberg SM, Erion G, Chen H, DeGrave A, Prutkin JM, Nair B, et al. From local  
801 explanations to global understanding with explainable AI for trees. *Nature machine*  
802 *intelligence*. 2020;2: 2522–5839.
- 803 63. Humphrey SJ, James DE, Mann M. Protein Phosphorylation: A Major Switch Mechanism  
804 for Metabolic Regulation. 2015.
- 805 64. Amoutzias GD, He Y, Gordon J, Mossialos D, Oliver SG, Van de Peer Y. Posttranslational  
806 regulation impacts the fate of duplicated genes. *Proceedings of the National Academy of*  
807 *Sciences*. 2010. doi:10.1073/pnas.0911603107
- 808 65. Kochanowski K, Volkmer B, Gerosa L, Van Rijsewijk BRH, Schmidt A, Heinemann M.  
809 Functioning of a metabolic flux sensor in *Escherichia coli*. *Proc Natl Acad Sci U S A*. 2013.  
810 doi:10.1073/pnas.1202582110
- 811 66. Choi KR, Jang WD, Yang D, Cho JS, Park D, Lee SY. Systems Metabolic Engineering  
812 Strategies: Integrating Systems and Synthetic Biology with Metabolic Engineering. 2019.
- 813 67. Hart T, Chandrashekar M, Aregger M, Steinhart Z, Brown KR, MacLeod G, et al. High-  
814 Resolution CRISPR Screens Reveal Fitness Genes and Genotype-Specific Cancer  
815 Liabilities. *Cell*. 2015. doi:10.1016/j.cell.2015.11.015
- 816 68. Hart T, Tong AHY, Chan K, Van Leeuwen J, Seetharaman A, Aregger M, et al. Evaluation  
817 and design of genome-wide CRISPR/SpCas9 knockout screens. *G3: Genes, Genomes,*  
818 *Genetics*. 2017. doi:10.1534/g3.117.041277
- 819 69. Orth JD, Conrad TM, Na J, Lerman JA, Nam H, Feist AM, et al. A comprehensive genome-  
820 scale reconstruction of *Escherichia coli* metabolism--2011. *Mol Syst Biol*. 2011;7: 535.  
821 doi:10.1038/msb.2011.65
- 822 70. Duarte NC, Becker SA, Jamshidi N, Thiele I, Mo ML, Vo TD, et al. Global reconstruction of  
823 the human metabolic network based on genomic and bibliomic data. *Proc Natl Acad Sci U*  
824 *S A*. 2007;104: 1777–1782. doi:10.1073/pnas.0610772104
- 825 71. Becker SA, Feist AM, Mo ML, Hannum G, Palsson BO, Herrgard MJ. Quantitative  
826 prediction of cellular metabolism with constraint-based models: the COBRA Toolbox. *Nat*  
827 *Protoc*. 2007;2: 727–738. doi:nprot.2007.99 [pii]10.1038/nprot.2007.99
- 828 72. Schellenberger J, Lewis NE, Palsson B. Elimination of thermodynamically infeasible loops  
829 in steady-state metabolic models. *Biophys J*. 2011. doi:10.1016/j.bpj.2010.12.3707
- 830 73. Lewis NE, Hixson KK, Conrad TM, Lerman JA, Charusanti P, Polpitiya AD, et al. Omic data  
831 from evolved *E. coli* are consistent with computed optimal growth from genome-scale  
832 models. *Mol Syst Biol*. 2010;6: 390.
- 833 74. Martínez VS, Quek LE, Nielsen LK. Network thermodynamic curation of human and yeast  
834 genome-scale metabolic models. *Biophys J*. 2014. doi:10.1016/j.bpj.2014.05.029

- 835 75. Sánchez BJ, Zhang C, Nilsson A, Lahtvee P, Kerkhoven EJ, Nielsen J. Improving the  
836 phenotype predictions of a yeast genome-scale metabolic model by incorporating  
837 enzymatic constraints. *Mol Syst Biol*. 2017. doi:10.15252/msb.20167411
- 838 76. Heckmann D, Lloyd CJ, Mih N, Ha Y, Zielinski DC, Haiman ZB, et al. Machine learning  
839 applied to enzyme turnover numbers reveals protein structural correlates and improves  
840 metabolic models. *Nat Commun*. 2018. doi:10.1038/s41467-018-07652-6
- 841 77. Yeo HC, Hong J, Lakshmanan M, Lee DY. Enzyme capacity-based genome scale  
842 modelling of CHO cells. *Metab Eng*. 2020. doi:10.1016/j.ymben.2020.04.005
- 843 78. Shen F, Cheek C, Chandrasekaran S. Dynamic network modeling of stem cell metabolism.  
844 2019. doi:10.1007/978-1-4939-9224-9\_14
- 845 79. Freund Y, Schapire RE. Experiments with a New Boosting Algorithm. *Proceedings of the*  
846 *13th International Conference on Machine Learning*. 1996. doi:10.1.1.133.1040
- 847 80. Huang KY, Su MG, Kao HJ, Hsieh YC, Jhong JH, Cheng KH, et al. dbPTM 2016: 10-year  
848 anniversary of a resource for post-translational modification of proteins. *Nucleic Acids*  
849 *Research*. 2016. doi:10.1093/nar/gkv1240
- 850 81. The UniProt Consortium. UniProt: a worldwide hub of protein knowledge | *Nucleic Acids*  
851 *Research* | Oxford Academic. *Nucleic Acids Research*. 2019. Available:  
852 <https://www.ncbi.nlm.nih.gov/pubmed/30395287>
